# Supplementary material for: Case stories in general practice: a focus group study
Source: PubMed Central journal article supplement — BMJ Open. 2012 Aug 8;2(4):e001208. doi: 10.1136/bmjopen-2012-001208 (PMC3425945; doi:10.1136/bmjopen-2012-001208), 2012-08-08
Supplement: bmjopen-2012-001208.draft_revisions.pdf [file bmjopen-2012-001208.draft_revisions.pdf]

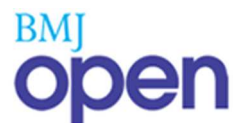

**Case stories in small-group activity in general practice. A focus group study from backstage**

|                                 |                                                                                                                                                                                                                                                                                                                                                  |
|---------------------------------|--------------------------------------------------------------------------------------------------------------------------------------------------------------------------------------------------------------------------------------------------------------------------------------------------------------------------------------------------|
| Journal:                        | <i>BMJ Open</i>                                                                                                                                                                                                                                                                                                                                  |
| Manuscript ID:                  | bmjopen-2012-001208                                                                                                                                                                                                                                                                                                                              |
| Article Type:                   | Research                                                                                                                                                                                                                                                                                                                                         |
| Date Submitted by the Author:   | 28-Mar-2012                                                                                                                                                                                                                                                                                                                                      |
| Complete List of Authors:       | Abildsnes, Eirik; University of Bergen, Department of Public Health and Primary Health Care<br>Flottorp, Signe; The Norwegian Knowledge Centre for the Health Services, ; University of Bergen, Department of Public Health and Primary Health Care<br>Stensland, Per; University of Bergen, Department of Public Health and Primary Health Care |
| <b>Primary Subject Heading</b>: | General practice / Family practice                                                                                                                                                                                                                                                                                                               |
| Secondary Subject Heading:      | Communication, Ethics, Medical education and training, Patient-centred medicine, Qualitative research                                                                                                                                                                                                                                            |
| Keywords:                       | EDUCATION & TRAINING (see Medical Education & Training), QUALITATIVE RESEARCH, GENERAL MEDICINE (see Internal Medicine), MEDICAL EDUCATION & TRAINING, MEDICAL ETHICS, PRIMARY CARE                                                                                                                                                              |
|                                 |                                                                                                                                                                                                                                                                                                                                                  |

SCHOLARONE™  
Manuscripts

only

1  
2  
3 **Case stories in small-group activity in general practice. A focus group study from**  
4 **backstage**  
5  
6  
7

8 Eirik Abildsnes, Signe Flottorp, Per Stensland  
9

10  
11 Department of Public Health and Primary Health Care, University of Bergen, N-5020 Bergen,  
12 Norway Eirik Abildsnes

13 research fellow Norwegian Knowledge Centre for the Health Services, N-0130 Oslo, Norway

14 Signe Flottorp

15 senior researcher Department of Public Health and Primary Health Care, University of Bergen

16 Per Stensland

17 associate professor  
18  
19

20  
21 Correspondance to: E Abildsnes eabil@broadpark.no  
22  
23  
24  
25  
26  
27  
28  
29  
30  
31  
32  
33  
34  
35  
36  
37  
38  
39  
40  
41  
42  
43  
44  
45  
46  
47  
48  
49  
50  
51  
52  
53  
54  
55  
56  
57  
58  
59  
60

1  
2  
3 **Case stories in small-group activity in general practice. A focus group study from**  
4 **backstage.**  
5  
6

7 **Abstract**  
8

9 **Objectives** To explore the interactive process of sharing case stories in small-group activity in  
10 general practice.  
11

12 **Design** Qualitative focus group study.

13 **Setting** Peer group meetings of doctors attending specialist training or continuous medical  
14 education in general practice.  
15

16 **Participants** Twenty female and 30 male doctors working in general practice in Norway.

17 **Results** The storyline of case presentations included detailed stories with emotional  
18 engagement, co-authored by other group members. The stories initiated discussions and  
19 reflections concerning patients' and doctors' perspectives, medical ethics as well as clinical  
20 problems. The safe atmosphere allowed testing out boundaries of socially shared knowledge.  
21

22 **Conclusions** Sharing case stories in small-groups in general practice initiated interaction that  
23 facilitated meaning-making, reflection and peer support.  
24  
25  
26

27 **Article summary**  
28

29 Article focus  
30

- 31 • Sharing case stories have longstanding traditions among doctors. General practitioners  
32 share case stories in small-group learning.
- 33 • Socially shared knowledge is formed and maintained through dialogical thinking and  
34 communication, and affects what is being talked about and the manner by which  
35 content is framed.
- 36 • We intended to explore the interactive process of discussing case stories in peer  
37 groups of general practitioners.  
38  
39  
40

41 Key messages  
42

- 43 • Case presentations in focus groups included detailed stories with emotional  
44 engagement and co-authoring from other group members.
- 45 • Group interaction initiated discussions about the patients' and doctors' behaviours and  
46 agendas, ethical implications and the handling of clinical problems in everyday  
47 practice.
- 48 • Case discussions inspired group members to reflect upon the complexity of  
49 counselling and the doctors' roles. The participants offered each other critique and  
50 peer support.  
51  
52  
53  
54

55 Strengths and limitations  
56

- 57 • The presence of the researchers influenced what group members chose to tell.  
58  
59  
60

- Being a peer may cause blindness to aspects of the discussions that a researcher with different background would see.
- The participants discussed real case stories from their own practice.

## Introduction

Case stories have longstanding traditions in medicine. Doctors share case stories when referring patients to hospital from primary health care, at morning reports in hospital, and when discussing interesting or difficult cases.<sup>1,2</sup> Case stories include everyday practice, dramatic “war stories” and anecdotes of uncommon practice. The stories aim to provide a professional audience with succinct and sufficient information.<sup>3</sup> Doctors adopt the medical storyline early in their career. During case presentations students, interns and residents improve knowledge based on clinical experience, and learn the medical language, professional principles, traditions and values.<sup>4</sup> Their supervisors evaluate their presentations based on relevance, conciseness and mastery of the medical language.<sup>5</sup> Patients adjust their illness narratives to the listening doctor,<sup>6</sup> doctors adjust their retelling and interpretations into case stories suitable for a professional audience.<sup>7</sup>

Peer groups of general practitioners share professional competence, experience and social role. Socially shared knowledge has an interactive nature. It is formed and maintained through dialogical thinking and communication, and affects what is being talked about and the manner by which content is framed.<sup>8</sup> It influences how group members speak about others, such as patients, other professionals or health authorities. Dialogues involve tension and intentions, and dealing with the implicit shared knowledge within a group is an important social skill.<sup>9</sup> The distribution of this competence within a group may affect group dynamics, and the outcome of group discussions. Communication is affected by fear of losing face, indirect communication and hidden agendas. While group members talk to each other, they may simultaneously carry out internal dialogues with themselves or others.<sup>8</sup>

Research on the development of doctors’ communication patterns emphasizes that medical education, internship and residency influence doctors’ identities in ways that affect communication with patients.<sup>10</sup> Case-based teaching is used along with problem-based teaching in medical education, and is well suited for small-group teaching.<sup>11</sup> Problem-based teaching focuses on a particular clinical problem, while case-based teaching focuses on a particular patient presenting with a clinical problem. In general practice case-based learning in organized peer groups is widely used.<sup>12-15</sup> Permanent small-group activities have become an important part of CME in many countries, and if well functioning as supportive networks to share knowledge and clinical experience.<sup>16-19</sup>

The primary aim of the research project was to study general practitioners’ experience with lifestyle counselling. While conducting focus group sessions among general practitioners,<sup>20</sup> we observed interesting interaction within the groups, and decided to explore this interaction in detail. We have not identified studies that explore the interactive process of discussing case

1  
2  
3 stories in peer groups of general practitioners, and aimed to do so in this paper.  
4

## 5 6 **Methods**

7  
8 We invited seven established peer groups from the southern part of Norway to attend focus  
9 group sessions on lifestyle counselling. We used strategic sampling to obtain information  
10 from doctors with as varied background and experience as possible. Six groups accepted the  
11 invitation, one group did not answer. Two groups of interns (17 participants), one group of  
12 residents (eight participants) and two groups of partners (13 participants) attended. One group  
13 consisted of three residents and nine partners. Partners were specialists in general practice.  
14 Groups of interns and residents have a supervisor. The supervisor did not participate in the  
15 focus group sessions. The participants included 20 female and 30 male doctors. Twenty-nine  
16 had graduated from Norwegian medical schools, 21 had graduated from medical schools in  
17 seven different European countries. Among the specialists, 16 had worked more than ten  
18 years as a specialist in family medicine. Eighteen physicians practiced in rural communities  
19 with less than 10 000 inhabitants. Twenty-one worked in communities with between 10 000  
20 and 20 000 inhabitants, while 11 worked in towns with more than 20 000 inhabitants. One  
21 participant practiced solo, the rest worked in group practices.  
22  
23  
24  
25  
26

27 Having conducted six groups with 50 physicians, we experienced data saturation regarding  
28 the topic on lifestyle counselling. We realised that we also had abundant examples of group  
29 interactions.  
30  
31

32 To initiate a dialogue in the focus groups we used the Critical Incident Technique.<sup>21</sup>  
33 According to this procedure, we invited the participants to present case stories from their own  
34 practice about lifestyle counselling which ended up as either a success or a failure. The group  
35 members commented on each story, and told about similar or contrasting experiences. We  
36 used no interview guide. The first author audio-taped and conducted the group sessions and  
37 made field notes at the end of each session to supply transcripts. An observer, a sports  
38 scientist, also made field notes, summarized his impressions, and asked for comments at the  
39 end of each session to avoid misunderstandings. We considered audiotape recordings as an  
40 acceptable basis to study verbal interaction.  
41  
42  
43  
44

45 The first author, an experienced general practitioner, transcribed the audio-tapes verbatim. We  
46 used Systematic Text Condensation and an editing analysis style in analysis.<sup>22 23</sup> Bracketing  
47 preconceptions, we first read the material searching for an overall impression. The first and  
48 third author independently examined the text for units of meaning representing interaction and  
49 process in the presentation and discussion of case stories. We coded and grouped these units,  
50 contrasted and abstracted the content in each group, and finally discussed and summarised the  
51 content of each group into generalised descriptions of aspects of interaction. If illustrating  
52 quotes included more than one participant, we used fictive names to identify the participants.  
53  
54  
55  
56  
57

## 58 **Results**

1  
2  
3  
4 We analysed interactions among the participants when they presented and discussed case  
5 stories about lifestyle counselling.  
6  
7

8  
9 *A different storyline*  
10

11 Some of the participants referred condensed case histories, including results of measurements,  
12 laboratory tests and supplementary investigations. They described treatment outcomes in a  
13 similar brief and objective way. The other group members seldom interrupted these  
14 presentations, but asked questions and made comments after the case presentation. Other  
15 stories were more detailed and expansive. In these sequences the storytellers presented their  
16 own attitudes, emotions and reflections as well as their patients'. The other group members  
17 often made comments and asked questions during these detailed case presentations, and in  
18 this way co-authored the narrative. These stories often involved other aspects of the patients'  
19 histories than the particular medical problem in question. Tom, an experienced partner, told  
20 about his strategy when talking to patients who relapsed after smoking cessation:  
21  
22  
23  
24

25  
26 Tom: I try to motivate those who have quit smoking, and remind them that it is great  
27 that they have managed to quit. Don't forget it.

28 Ben: Many times, and for those who have had a relapse, remind them that they have  
29 succeeded once.  
30

31 Sandra: Yes, that's right. Focus on what you [the patient] did to succeed.

32 Tom: Focus on what went wrong, what happened, and how we can prevent it from  
33 happening again.  
34  
35  
36

37 *Discussing and solving disagreements*  
38

39 The case stories elicited discussions about how to handle clinical problems, the feasibility of  
40 clinical guidelines, checklists and evidence based medicine. The participants carefully  
41 suggested different counselling approaches, their own experience in similar situations and  
42 commented politely on the proposals suggested. When disagreements occurred, we observed  
43 moderate competition about being right, but the groups often reached mutual agreement. A  
44 few times disagreement was solved by referring to clinical guidelines. The participants often  
45 asked the rest of the group for advice, reflected upon ethical implications and discussed  
46 cooperation with other healthcare providers. John, a male resident told a narrative about  
47 treating a patient with obesity:  
48  
49  
50  
51

52 Kate: You measured weight now and then?

53 John: Yes, in the beginning we did. We observed a nice reduction. It was the start of  
54 a successful story which is unusual.  
55

56 Conductor: What do you think about measuring weight in such consultations?

57 Kate: I actually ask the patients about that, whether they want to be weighed or not. I  
58  
59  
60

1  
2  
3 think weighing is ambiguous, get stuck to numbers. Weight does not always  
4 tell you about how the body changes.

5 John: Use waist circumference.  
6  
7  
8

### 9 *Case-based thinking*

10  
11 The case presentations initiated detailed discussions about the patients' agendas. The  
12 participants discussed what they believed to be the particular patient's expectations about the  
13 consultation, and the doctor's involvement. Some compared their patients' situation with their  
14 own. The storyteller explained the sources of the patients' motivation for change of lifestyle,  
15 and gave background information about the patients' experiences and identity beyond the  
16 medical problem in question. The groups discussed how this information could be utilised in  
17 the consultation.  
18  
19  
20  
21

22 I had a patient that actually succeeded in losing weight. She was about 35 years old.  
23 What made her succeed was that abdominal plastic surgery to remove excessive skin  
24 folds should be paid for when her body mass index was normalised. That was her  
25 motivation, to be operated and being able to wear bikini again. (Female resident)  
26  
27  
28

29 Detailed information about the patients initiated reflections among group members about the  
30 complexity of many patients' lives, their self-efficacy and motivation for lifestyle change  
31 despite these constraints. Several expressed respect and admiration of how their patients  
32 managed.  
33  
34

35 It is actually fascinating how much power that might be hidden behind rather poor  
36 facades. A complicated family situation, severe obesity, unemployment. Actually  
37 problems from A to Z. (female partner)  
38  
39

40 Some participants defended their patients if other group members criticised or made jokes  
41 about their patients during case discussions. Paula, a female intern presented a case story of a  
42 man taking anabolic steroids:  
43

44 Ann: What kind of education or work did he have?

45 Paula: I don't remember.

46 Ann: Security guard, maybe?

47 Mike: You are rather stereotype!

48 Ann: No, do you think he had any education?

49 Paula: No, I don't think so, but he was employed in sales business. He seemed quite  
50 bright when I talked to him.  
51  
52  
53  
54

55 In other situations, the doctors supported each other's denigration of patients, and made jokes  
56 about them. Some case stories included patients who did not comply with the doctors'  
57 proposals, even when non-compliance would imply a serious threat to the patient's health.  
58  
59  
60

1  
2  
3 The participants commented on how patients fooled themselves, made unwise decisions or  
4 proposed easy solutions to solve complex problems. A group of partners discussed patients'  
5 self reported dietary habits:  
6

7  
8 Kate: The problem was that she ate next to nothing. She did everything right.

9 Peter: It's amazing. All of my obese patients belong to the group that tell they never  
10 eat much.

11 Rose: They know they are lying.

12 Peter: Just let them write down what they eat for three days. Make an agreement  
13 about three normal days.  
14  
15  
16

### 17 18 *Reflections about the professional role* 19

20  
21 The case stories initiated discussions of meta-perspectives. The participants commented on  
22 the storyteller's professional behaviour, and how this behaviour affected the consultations and  
23 the patients. The participants shared professional knowledge concerning medical ethics and  
24 the need to tailor counselling to each patient. Stories about consultations that failed elicited  
25 discussions about how to elicit the patient's agenda, the fear of provoking distrust, and the  
26 problem of unintended intimidation of patients when approaching the patients' deeply rooted  
27 habits.  
28  
29

30  
31 Maybe you do everything right. Then you end up by not giving him the responsibility,  
32 in a way. In such a situation I would use the fatalistic part of me, and tell him that he  
33 was responsible. Sometimes maybe we are too eager, and take the responsibility from  
34 the patient. (Male partner)  
35  
36  
37

### 38 39 *Peer support* 40

41  
42 Several participants told about counselling that failed. This comprised complex situations  
43 when both the doctor and the patient despaired, but also consultations in which the doctor  
44 made proposals or decisions they later regretted. Some expressed significant emotional  
45 involvement and personal disappointment when communication failed, others told about their  
46 own struggle with lifestyle. The participants shared frustration related to insufficient support  
47 from specialized health care, reluctant patients, and difficulties in doctor-patient  
48 communication. Discussing these narratives, peer group members offered care and support,  
49 but also constructive critique and alternative solutions. They often responded by telling about  
50 similar experiences, and argued that doctors should expect limited success in complex  
51 consultations:  
52  
53

54  
55 Rose: I thought about it after she had been there, that fifteen or twenty minutes - she  
56 should have fifteen or twenty minutes to solve each of those problems.

57 Jane: It can be too much for a family physician, when specialist health care tells you  
58  
59  
60



1  
2  
3 to follow up every patient.

4 Edith: But we should not solve everything. I have low ambitions about solving other  
5 people's health problems.  
6  
7  
8

9  
10 *Informal associations*

11 The informal atmosphere in the peer-groups allowed spontaneous associations and proposals,  
12 including suggestions about how to organise health care and ideas about alternative ways of  
13 counselling patients. The participants joked and told anecdotes, triggered by the case  
14 discussions and associations from their own life. A group of residents discussed repetitively  
15 reminding patients to quit smoking:  
16  
17

18  
19 Eric: Just mention smoking when they come in. I think it enhances motivation in the  
20 long run. My dentist has asked me every year if I use fluoride, and I don't. But  
21 the last two months I have used it, because he asked again. He has not done  
22 anything but ask me every time I met him.  
23

24 Ruth: Same with me, but I have not managed yet.

25 Peter: Isn't it better to use dental floss?

26 Eric: But who uses dental floss?

27 Ruth: I'm thinking about it (laughter).  
28  
29  
30  
31

32 **Discussion**

33  
34 The storyline of case presentations in focus groups included detailed stories with emotional  
35 engagement and co-authoring from other group members. The group interaction initiated  
36 discussions about the patients' and doctors' behaviours and agendas in the consultations,  
37 ethical implications and the handling of clinical problems in everyday practice. The case  
38 stories inspired group members to reflect upon the complexity of counselling and the doctors'  
39 roles. The participants offered each other critique and peer support.  
40  
41  
42

43  
44 The presence of the researchers in the focus groups may have influenced what group members  
45 chose to tell.<sup>24</sup> To reduce this influence, the conductor chose a withdrawn position, and  
46 seldom interrupted the group discussions. Being a peer may elicit information that would not  
47 be told to a researcher with a different background,<sup>25</sup> but may also cause blindness to aspects  
48 of the discussions that a researcher with different background would see. This was  
49 compensated to some extent by the presence of an observer with another professional  
50 background. The group members knew each other quite well, and we conducted the group  
51 sessions in a scheduled meeting. The participants discussed real case stories from their own  
52 practice. This strengthens the validity of the study. Video recordings would have provided  
53 more information about non-verbal communication, but also increased the possibility of  
54 information overload.  
55  
56  
57  
58  
59  
60

1  
2  
3 Some of the case stories followed the traditional, succinct storyline of case presentation, while  
4 expansive stories represented a different genre, encompassing more focus on the patients' life  
5 context. We observed co-authoring during the expansive case presentations. In focus groups  
6 the audience may supply the speaker by verbal interruption, exclamations, supportive or  
7 confronting utterances, and by non-verbal communication. The speaker may address the  
8 whole group, or a selected person. Moments of 'split floor' and polyphonic discussions occur,  
9 as well as moments in which nobody wants to 'take the floor'.<sup>26</sup> In this study we observed  
10 'split floor' and polyphonic discussions, but never moments when nobody 'took the floor'.  
11 This may be because the participants knew each other well, and the topic was engaging.  
12  
13  
14

15 Prepared, condensed presentations represents front stage communication,<sup>27</sup> also described in  
16 studies of morning reports in hospitals.<sup>2,28</sup> In front stage communication the 'actor' plays the  
17 expected role. Front stage communication can be presented to anyone. Detailed case stories  
18 with emotional engagement that admit uncertainty or failure, represent back stage  
19 communication.<sup>27</sup> This is not meant for outsiders, and only occurs in a safe environment.  
20 Professional back stage communication is included in the hidden curriculum of medical  
21 education, supports each group member and strengthens group affiliation.<sup>29,30</sup>  
22  
23  
24

25 Humans socialize into groups that share social knowledge and communication.<sup>31,32</sup> Peer  
26 groups of general practitioners share professional competence, experience and social roles.  
27 Socially shared knowledge is formed and maintained through dialogical communication, and  
28 shapes what is being spoken about and the manner by which contents are framed.<sup>8</sup> We  
29 observed that this influenced how group members spoke about patients, other professionals  
30 and governmental institutions.  
31  
32

33 We noticed spontaneous associations, jokes about patients and anecdotes about controversial  
34 behaviour of doctors, reflecting an informal, supportive back stage atmosphere and group  
35 affiliation. We also observed attempts to try out controversial statements. Testing out the  
36 limits of acceptable behaviour is a frequent strategy in dialogues. While people talk to each  
37 other, they simultaneously carry out internal dialogues with themselves or others to position  
38 themselves in the discussion.<sup>8</sup> A participant may not wish to reveal her true opinion, be  
39 humiliated or step out of the group. This can be solved by using incomplete utterances, jokes,  
40 quoting 'third parties' and prompting for collaborative utterances.<sup>33</sup> Disrespectful comments  
41 about patients in some instances initiated constructive critique and a reminder of the ethical  
42 behaviour. The discussions addressed moral perception and the ability to identify ethical  
43 aspects in clinical situations.<sup>34</sup>  
44  
45  
46  
47  
48

49 Some participants told about their own struggle with lifestyle. Several narratives concerned  
50 counselling that failed. The group members obviously trusted each other, and utilized the peer  
51 group as an arena of debriefing and peer support. Brondt et al showed that participation in  
52 peer groups as part of CME was associated with decreased risk of professional dysfunction  
53 among Danish GPs.<sup>35</sup>  
54  
55

56 The participants discussed patients' behaviour on a distanced level, but also demonstrated  
57 close, personal emotional involvement in patients' life world, and intentions of exploring  
58  
59  
60

1  
2  
3 patients' agenda. We have used the concept 'case-based thinking' to signify how a case-based  
4 narrative approach expands the emphasis on medical knowledge and the medical problem in  
5 question, to encompass context, personal and emotional involvement where only thin layers  
6 of distance exist between the general practitioner and the patient. A distinction exists between  
7 patient-centred care and person-focused care. The latter has a much broader, encompassing  
8 focus. Person-focused care is based on accumulated knowledge of people, which provides the  
9 basis for better recognition of health problems and needs over time, and facilitates appropriate  
10 care for these needs in the context of other needs.<sup>36 37</sup>

11  
12  
13  
14 The group interaction initiated discussions about best practice, and exchange of practical tips.  
15 The starting point of the discussions was not theory or evidence, but clinical experience.  
16 However, in some situations the participants referred to clinical guidelines to solve  
17 disagreements. Peer group meetings are suitable for introduction of attempts to improve  
18 practice skills.<sup>38 39</sup> The storyteller tradition of case stories put clinical problems into context,  
19 and seemed to promote mutual reflections about counselling that might enhance meaning-  
20 making and reflective practice.<sup>40</sup>

## 21 22 23 24 **Conclusion**

25  
26  
27 Presentations and discussions of case stories in peer groups of general practitioners followed a  
28 detailed storyline, and initiated dialogues that highlighted patients' perspectives and  
29 facilitated learning, discussions of best practice and reflections on medical ethics. The safe  
30 backstage atmosphere permitted expression of emotions, peer support, and testing out ideas  
31 and opinions. The interaction facilitated sense-making and meaning-making activity that  
32 influenced socially shared knowledge within the group.

## 33 34 35 36 37 **Acknowledgements**

38 Thanks to the colleagues who participated in the focus groups, and to John Johansen who  
39 assisted as observer in the focus group discussions.

## 40 41 42 **Competing interests** None

43  
44  
45 **Contributors** EA and PS prepared the study protocol. EA collected the data. All authors were  
46 involved in analysis, interpretation and drafting the manuscript. EA is the guarantor.

47  
48  
49 **Ethical approval** The study did not involve patients. The doctors presented all case stories  
50 anonymously. The Regional Committee for Ethics in Medical Research regarded the study not  
51 to be within their mandate. All participants signed a declaration of informed consent before  
52 participation.

53  
54  
55 **Funding** The study was supported by the Norwegian Medical Association's fund for research  
56 in general practice.

- 1
- 2
- 3 1. Matalon A, Calo H, Yaphe J. The role of the staff meeting in resolving professional dilemmas in  
4 family medicine: concealing a diagnosis. *Eur J Gen Pract* 2004;10(1):35-6, 40.
- 5 2. Apker J, Eggly S. Communicating professional identity in medical socialization: considering the  
6 ideological discourse of morning report. *Qual Health Res* 2004;14(3):411-29.
- 7 3. Anspach RR. Notes on the sociology of medical discourse: the language of case presentation. *J*  
8 *Health Soc Behav* 1988;29(4):357-75.
- 9 4. Hill RF, Tyson EP, Riley HD, Jr. The culture of morning report: ethnography of a clinical teaching  
10 conference. *South Med J* 1997;90(6):594-600.
- 11 5. Gross CP, Donnelly GB, Reisman AB, Sepkowitz KA, Callahan MA. Resident expectations of morning  
12 report: a multi-institutional study. *Arch Intern Med* 1999;159(16):1910-4.
- 13 6. Greenhalgh T. *What Seems to be the Trouble? Stories in illness and healthcare*. Oxon: Radcliffe  
14 Publishing Ltd, 2006.
- 15 7. Charon R. *Narrative medicine: Honoring the Stories of Illness*. Oxford: Oxford University Press,  
16 2006.
- 17 8. Marková I. Dialogism: interaction, social knowledge and dialogue. In: Marková I, editor. *Dialogue in*  
18 *focus groups*. London: Equinox Publishing Ltd, 2007.
- 19 9. Rommetveit R. *On message structure: A framework for the study of language and communication*.  
20 London and New York: Wiley, 1974.
- 21 10. Malhotra A, Gregory I, Darvill E, Goble E, Pryce-Roberts A, Lundberg K, et al. Mind the gap:  
22 Learners' perspectives on what they learn in communication compared to how they and  
23 others behave in the real world. *Patient Educ Couns* 2009;76(3):385-90.
- 24 11. Srinivasan M, Wilkes M, Stevenson F, Nguyen T, Slavin S. Comparing problem-based learning with  
25 case-based learning: effects of a major curricular shift at two institutions. *Acad Med*  
26 2007;82(1):74-82.
- 27 12. Launer J. Moving on from Balint: embracing clinical supervision. *Br J Gen Pract* 2007;57(536):182-  
28 3.
- 29 13. Treweek S, Flottorp S, Fretheim A, Havelsrud K, Kristoffersen DT, Oxman A, et al. Hva gjør  
30 fastleger for å holde seg faglig oppdatert? [What do general practitioners do to keep  
31 themselves up to date?]. *Tidsskr Nor Lægeforen* 2005;125(3):304-6.
- 32 14. Rabinowitz S, Maoz B, Weingarten M, Kasan R. Listening to patients' stories. Storytelling  
33 approach in family medicine. *Can Fam Physician* 1994;40:2098-102.
- 34 15. Premi J, Shannon S, Hartwick K, Lamb S, Wakefield J, Williams J. Practice-based small-group CME.  
35 *Acad Med* 1994;69(10):800-2.
- 36 16. Armson H, Kinzie S, Hawes D, Roder S, Wakefield J, Elmslie T. Translating learning into practice:  
37 lessons from the practice-based small group learning program. *Can Fam Physician*  
38 2007;53(9):1477-85.
- 39 17. Pereles L, Lockyer J, Fidler H. Permanent small groups: group dynamics, learning, and change. *J*  
40 *Contin Educ Health Prof* 2002;22(4):205-13.
- 41 18. Peloso PM, Stakiw KJ. Small-group format for continuing medical education: a report from the  
42 field. *J Contin Educ Health Prof* 2000;20(1):27-32.
- 43 19. Eliasson G, Mattsson B. From teaching to learning. Experiences of small CME group work in  
44 general practice in Sweden. *Scand J Prim Health Care* 1999;17(4):196-200.
- 45 20. Abildsnes E, Walseth LT, Flottorp SA, Stensland PS. Lifestyle consultation in general practice--the  
46 doctor's toolbox: a qualitative focus group study. *Fam Pract* 2011;28(2):220-5.
- 47 21. Bradley CP. Turning anecdotes into data--the critical incident technique. *Fam Pract* 1992;9(1):98-  
48 103.
- 49 22. Miller WL, Crabtree BJ. Clinical research. A multimethod typology and qualitative roadmap. .  
50 *Doing Qualitative Research*. 2 ed. Thousand Oaks, CA: Sage, 1999:20-24.
- 51 23. Malterud K. Shared understanding of the qualitative research process. Guidelines for the medical  
52 researcher. *Fam Pract* 1993;10(2):201-6.
- 53 24. Coar L, Sim J. Interviewing one's peers: methodological issues in a study of health professionals.  
54 *Scand J Prim Health Care* 2006;24(4):251-6.
- 55
- 56
- 57
- 58
- 59
- 60

- 1
- 2
- 3 25. Chew-Graham CA, May CR, Perry MS. Qualitative research and the problem of judgement:  
4 lessons from interviewing fellow professionals. *Fam Pract* 2002;19(3):285-9.
- 5 26. Gossen M. Dialogical analyses of focus groups: data and analytical approaches. In: Marková I,  
6 editor. *Dialogue in focus groups*. London: Equinox Publishing Ltd, 2007.
- 7 27. Goffman E. *The Presentation of Self in Everyday Life*. New York: Doubleday, 1959.
- 8 28. Mishler EG. *Discourse of medicine: Dialectics of medical interview*. Norwood, NJ: Ablex, 1884.
- 9 29. Wear D, Aultman JM, Varley JD, Zarconi J. Making fun of patients: medical students' perceptions  
10 and use of derogatory and cynical humor in clinical settings. *Acad Med* 2006;81(5):454-62.
- 11 30. Bennett N, Lockyer J, Mann K, Batty H, LaForet K, Rethans JJ, et al. Hidden curriculum in  
12 continuing medical education. *J Contin Educ Health Prof* 2004;24(3):145-52.
- 13 31. Weber M. *Wirtschaft und Gesellschaft*. Tübingen: J.B.C. Mohr, 1976.
- 14 32. Bourdieu P. *Meditasjoner (Méditations pascaliennes)*. Oslo: Pax forlag A/S, 1999.
- 15 33. Marková I. Themata in dialogue: taking social knowledge as shared. In: Marková I, editor.  
16 *Dialogue in focus groups*. London: Equinox Publications Ltd, 2007.
- 17 34. Vetlesen AJ. *Perception, empathy, and judgement: An Inquiry into the Preconditions of Moral*  
18 *Performance*. University park, PA: The Pennsylvania University Press, 1994.
- 19 35. Brondt A, Sokolowski I, Olesen F, Vedsted P. Continuing medical education and burnout among  
20 Danish GPs. *Br J Gen Pract* 2008;58(546):15-9.
- 21 36. Starfield B. Is patient-centered care the same as person-focused care? *Perm J* 2011;15(2):63-9.
- 22 37. Meador BT, Rogers C. Person-centered therapy. In: Corsini RJ, editor. *Current psychotherapies*. 2  
23 ed. Itasca, Illinois: F.E. Peacock Publishers, 1979:131-84.
- 24 38. Frich JC, Hoyer S, Lindbaek M, Straand J. General practitioners and tutors' experiences with peer  
25 group academic detailing: a qualitative study. *BMC Fam Pract* 2010;11:12.
- 26 39. Straand J, Fetveit A, Rognstad S, Gjelstad S, Brekke M, Dalen I. A cluster-randomized educational  
27 intervention to reduce inappropriate prescription patterns for elderly patients in general  
28 practice--The Prescription Peer Academic Detailing (Rx-PAD) study [NCT00281450]. *BMC*  
29 *Health Serv Res* 2006;6:72.
- 30 40. Schön DA. *Educating the Reflective Practitioner. Toward a new design for teaching and learning in*  
31 *the professions*. San Francisco: Jossey-Bass, 1987.
- 32
- 33
- 34
- 35
- 36
- 37
- 38
- 39
- 40
- 41
- 42
- 43
- 44
- 45
- 46
- 47
- 48
- 49
- 50
- 51
- 52
- 53
- 54
- 55
- 56
- 57
- 58
- 59
- 60

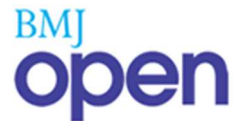

### Case stories in general practice: A focus group study

|                                 |                                                                                                                                                                                                                                                                                                                                                  |
|---------------------------------|--------------------------------------------------------------------------------------------------------------------------------------------------------------------------------------------------------------------------------------------------------------------------------------------------------------------------------------------------|
| Journal:                        | <i>BMJ Open</i>                                                                                                                                                                                                                                                                                                                                  |
| Manuscript ID:                  | bmjopen-2012-001208.R1                                                                                                                                                                                                                                                                                                                           |
| Article Type:                   | Research                                                                                                                                                                                                                                                                                                                                         |
| Date Submitted by the Author:   | 20-Jun-2012                                                                                                                                                                                                                                                                                                                                      |
| Complete List of Authors:       | Abildsnes, Eirik; University of Bergen, Department of Public Health and Primary Health Care<br>Flottorp, Signe; The Norwegian Knowledge Centre for the Health Services, ; University of Bergen, Department of Public Health and Primary Health Care<br>Stensland, Per; University of Bergen, Department of Public Health and Primary Health Care |
| <b>Primary Subject Heading</b>: | General practice / Family practice                                                                                                                                                                                                                                                                                                               |
| Secondary Subject Heading:      | Communication, Ethics, Medical education and training, Patient-centred medicine, Qualitative research                                                                                                                                                                                                                                            |
| Keywords:                       | EDUCATION & TRAINING (see Medical Education & Training), QUALITATIVE RESEARCH, GENERAL MEDICINE (see Internal Medicine), MEDICAL EDUCATION & TRAINING, MEDICAL ETHICS, PRIMARY CARE                                                                                                                                                              |
|                                 |                                                                                                                                                                                                                                                                                                                                                  |

SCHOLARONE™  
Manuscripts

1  
2  
3 **Case stories in general practice: A focus group study.**  
4  
5

6 Eirik Abildsnes, Signe Flottorp, Per Stensland  
7  
8

9  
10 Department of Public Health and Primary Health Care, University of Bergen, N-5020 Bergen,  
11 Norway Eirik Abildsnes  
12 research fellow Norwegian Knowledge Centre for the Health Services, N-0130 Oslo, Norway  
13 Signe Flottorp  
14 senior researcher Department of Public Health and Primary Health Care, University of Bergen  
15 Per Stensland  
16 associate professor  
17  
18

19  
20 Correspondence to: E Abildsnes eabil@broadpark.no  
21  
22  
23  
24  
25  
26  
27  
28  
29  
30  
31  
32  
33  
34  
35  
36  
37  
38  
39  
40  
41  
42  
43  
44  
45  
46  
47  
48  
49  
50  
51  
52  
53  
54  
55  
56

57 **Case stories in general practice: A focus group study .**  
58  
59  
60

## Abstract

**Objectives** To explore the interactive process of sharing case stories in small-group activity in general practice.

**Design** Qualitative focus group study.

**Setting** Peer group meetings of doctors attending specialist training or continuous medical education in general practice.

**Participants** Twenty female and 30 male doctors working in general practice in Norway.

**Results** The storyline of case presentations included detailed stories with emotional engagement, co-authored by other group members. The stories initiated discussions and reflections concerning patients' and doctors' perspectives, medical ethics as well as clinical problems. The safe atmosphere allowed testing out boundaries of socially shared knowledge.

**Conclusions** Sharing case stories in small-groups in general practice initiated interaction that facilitated meaning-making, reflection and peer support.

## Article summary

### Article focus

- Sharing case stories have longstanding traditions among doctors. General practitioners share case stories in small-group learning.
- Socially shared knowledge is formed and maintained through dialogical thinking and communication, and affects what is being talked about and the manner by which content is framed.
- We intended to explore the interactive process of discussing case stories in peer groups of general practitioners.

### Key messages

- Case presentations in focus groups included detailed stories with emotional engagement and co-authoring from other group members.

The case stories initiated discussions facilitating attention to person-focused care. Case story discussions in small-group learning functioned as an arena for testing out communication strategies to be used in consultations.

### Strengths and limitations

- The presence of the researchers influenced what group members chose to tell.
- Being a peer may cause blindness to aspects of the discussions that a researcher with different background would see.
- The participants discussed real case stories from their own practice.



## Introduction

Case stories have a longstanding tradition in medicine. Doctors share case stories when referring patients to hospital from primary health care, at morning reports in hospital, and when discussing interesting or difficult cases.<sup>1,2</sup> Case stories include everyday practice, dramatic “war stories” and anecdotes of uncommon practice. The stories aim to provide a professional audience with succinct and sufficient information to understand the specific clinical problem.<sup>3</sup> Doctors adopt the storyline of case presentations early in their career. During case presentations students, interns and residents improve knowledge based on clinical experience, and learn the medical language, professional principles, traditions and values.<sup>4</sup> Their supervisors evaluate their presentations based on relevance, conciseness and mastery of the medical language.<sup>5</sup> Doctors adjust their retelling and interpretations of the patients’ stories into case stories suitable for a professional audience.<sup>6</sup>

Peer groups of general practitioners share professional competence, experience and social role. Such socially shared knowledge has an interactive nature. It is formed and maintained through dialogical communication, and determines what is being talked about and the manner by which content is framed.<sup>7</sup> It influences how group members speak about others, such as patients, other professionals or health authorities. Dialogues involve tension and intentions, and dealing with this implicit shared knowledge within a group is an important social skill.<sup>8</sup> The distribution of this competence within a group may affect group dynamics, and the outcome of group discussions. Communication is affected by fear of losing face, indirect communication and hidden agendas. Group members may carry out unspoken, internal dialogues to try out their communication strategies before they take part in the spoken discussion.<sup>7</sup>

Research on the development of doctors’ communication patterns emphasizes that medical education, internship and residency influence doctors’ identities in ways that affect communication with patients.<sup>9</sup> Case-based teaching is used along with problem-based teaching in medical education, and is well suited for small-group teaching.<sup>10</sup> Problem-based teaching focuses on a particular clinical problem, while case-based teaching focuses on a particular patient presenting with a clinical problem. In general practice case-based learning in organized peer groups is widely used.<sup>11-14</sup> Permanent small-group activities have become an important part of CME in many countries, and can serve as supportive networks to share knowledge and clinical experience.<sup>15-18</sup>

While conducting focus group sessions among general practitioners to study general practitioners’ experience with lifestyle counselling,<sup>19</sup> we observed interesting interaction within the groups. We have not identified studies that explore the interactive process of discussing case stories. The aim of this paper is to explore and describe how peer groups of general practitioners interact when they share and discuss case stories.

## Methods

1  
2  
3  
4 In Norway interns spend six months of their internship in general practice, and they attend to  
5 supervised peer groups in these months. In specialist training in general practice, residents  
6 (specialist candidates) attend to three years of participation in supervised peer groups while  
7 they work in general practice. All partners (specialists in general practice, practicing  
8 physicians) attend to peer groups as a mandatory part of continuous medical education. In  
9 Norway it is required to recertify as specialist in general practice every fifth year. All  
10 groups meet four to six times a year, each meeting lasts two to three hours.  
11  
12

13  
14 We invited seven established peer groups from the southern part of Norway to attend focus  
15 group sessions on lifestyle counselling. We used strategic sampling to obtain information  
16 from doctors with as varied background and experience as possible. Six groups accepted the  
17 invitation, one group did not answer. Two groups of interns (17 participants), one group of  
18 residents (eight participants) and two groups of partners (13 participants) attended. The last  
19 group consisted of three residents and nine partners. The supervisor of interns and residents  
20 did not participate in the focus group sessions. The participants included 20 female and 30  
21 male doctors. Twenty-nine had graduated from Norwegian medical schools, 21 had graduated  
22 from medical schools in seven other European countries. Among the partners, 16 had worked  
23 more than ten years as a specialist in general practice. Eighteen physicians practiced in rural  
24 communities with less than 10 000 inhabitants. These participants did not differ from the rest  
25 with respect to background and clinical experience. Twenty-one worked in communities with  
26 between 10 000 and 20 000 inhabitants, while 11 worked in towns with more than 20 000  
27 inhabitants. One participant practiced alone, the rest worked in group practices.  
28  
29  
30  
31  
32

33 Having conducted six groups with 50 physicians, we experienced data saturation regarding  
34 the topic on lifestyle counselling. We realised that we also had abundant examples of group  
35 interactions regarding the case story discussions.  
36  
37

38 To initiate a dialogue in the focus groups we used the Critical Incident Technique.<sup>20</sup>  
39 According to this procedure, we invited the participants to present case stories from their own  
40 practice about lifestyle counselling which ended up as either a success or a failure. The group  
41 members commented on each story, and told about similar or contrasting experiences. We  
42 used no interview guide. The first author audio-taped and conducted the group sessions and  
43 made field notes at the end of each session to supply transcripts. An observer, a sports  
44 scientist, also made field notes, summarized his impressions, and asked for comments at the  
45 end of each session to avoid misunderstandings. We considered audiotape recordings to  
46 provide sufficient information to study verbal interaction.  
47  
48  
49  
50

51 The first author, an experienced general practitioner, transcribed the audio-tapes verbatim. We  
52 used Systematic Text Condensation and an editing analysis style in analysis.<sup>21 22</sup> Bracketing  
53 preconceptions, we first read the material searching for an overall impression. The first and  
54 third author independently examined the text for units of meaning representing interaction and  
55 process in the presentation and discussion of case stories. We coded and grouped these units,  
56 contrasted and abstracted the content in each group, and finally discussed and summarised the  
57  
58  
59  
60

1  
2  
3 content of each group into generalised descriptions of aspects of interaction. If illustrating  
4 quotes included more than one participant, we used fictitious names to identify the  
5 participants.  
6

7  
8 We analysed interactions among the participants when they presented and discussed case  
9 stories about lifestyle counselling.  
10

## 11 **Results**

### 12 *A different storyline of case presentations*

13  
14  
15  
16  
17 Some of the participants presented condensed case histories, focusing on objective data  
18 including results of measurements, laboratory tests and supplementary investigations. They  
19 described treatment outcomes in a similar brief and objective way. The other group members  
20 seldom interrupted these presentations, but asked questions and made comments after the case  
21 presentation. Other stories were more detailed and expansive. In these sequences the  
22 storytellers presented their own attitudes, emotions and reflections as well as their patients'.  
23 The other group members often made comments and asked questions during these detailed  
24 case presentations, and in this way co-authored the story. These stories often involved other  
25 aspects of the patients' histories than the particular medical problem in question. Tom, an  
26 experienced partner, told about his strategy when talking to patients who relapsed after  
27 smoking cessation.  
28  
29  
30  
31

32 Tom: I try to motivate those who have quit smoking, and remind them that it is great  
33 that they have managed to quit. Don't forget it.

34 Ben: Many times, and for those who have had a relapse, remind them that they have  
35 succeeded once.

36 Sandra: Yes, that's right. Focus on what you [the patient] did to succeed.

37 Tom: Focus on what went wrong, what happened, and how we can prevent it from  
38 happening again.  
39  
40  
41  
42

### 43 *Discussing and solving disagreements*

44  
45  
46 The case stories elicited discussions about how to handle clinical problems, the feasibility of  
47 clinical guidelines, checklists and evidence based medicine. The participants carefully  
48 suggested different counselling approaches, their own experience in similar situations and  
49 commented politely on the proposals suggested. When disagreements occurred, we observed  
50 moderate competition about being right, but the groups often reached mutual agreement. A  
51 few times disagreement was solved by referring to clinical guidelines. The participants often  
52 asked the rest of the group for advice, reflected upon ethical implications and discussed  
53 cooperation with other healthcare providers. John, a male resident told a story about treating a  
54 patient with obesity.  
55  
56  
57  
58  
59  
60

1  
2  
3 Kate: You measured weight now and then?

4 John: Yes, in the beginning we did. We observed a nice reduction. It was the start of  
5 a successful story which is unusual.

6  
7 Conductor: What do you think about measuring weight in such consultations?

8 Kate: I actually ask the patients about that, whether they want to be weighed or not. I  
9 think weighing is ambiguous, get stuck to numbers. Weight does not always  
10 tell you about how the body changes.

11 John: Use waist circumference.  
12  
13

### 14 15 16 *Case-based thinking*

17  
18 The case presentations initiated detailed discussions about the patients' agendas. The  
19 participants discussed what they believed to be the particular patient's expectations about the  
20 consultation, and the doctor's involvement. Some compared their patients' situation with their  
21 own. The storyteller explained the sources of the patients' motivation for change of lifestyle,  
22 and gave background information about the patients' experiences and identity beyond the  
23 medical problem in question. The groups discussed how this information could be utilised in  
24 the consultation.  
25  
26

27  
28 I had a patient who actually succeeded in losing weight. She was about 35 years old.  
29 What made her succeed was that abdominal plastic surgery to remove excessive skin  
30 folds should be paid for when her body mass index was normalised. That was her  
31 motivation, to be operated and being able to wear bikini again. (Female resident)  
32  
33

34  
35 Detailed information about the patients initiated reflections among group members about the  
36 complexity of many patients' lives, their self-efficacy and motivation for lifestyle change  
37 despite these constraints. Several expressed respect and admiration of how their patients  
38 managed their lives.  
39

40 It is actually fascinating how much power that might be hidden behind rather poor  
41 facades. A complicated family situation, severe obesity, unemployment. Actually  
42 problems from A to Z. (female partner)  
43  
44

45 Some participants defended their patients if other group members criticised or made jokes  
46 about them during case discussions. Paula, a female intern presented a case story of a man  
47 taking anabolic steroids:  
48

49  
50 Ann: What kind of education or work did he have?

51 Paula: I don't remember.

52 Ann: Security guard, maybe?

53 Mike: You are rather stereotype!

54 Ann: No, do you think he had any education?

55 Paula: No, I don't think so, but he was employed in sales business. He seemed quite  
56 bright when I talked to him.  
57  
58  
59  
60

1  
2  
3  
4 In other situations, the doctors supported each other's denigration of patients. Some case  
5 stories included patients who did not comply with the doctors' proposals, even when non-  
6 compliance would imply a serious threat to the patient's health. The participants commented  
7 on how patients fooled themselves, made unwise decisions or proposed too easy solutions to  
8 solve complex problems. A group of partners discussed patients' self reported dietary habits:  
9  
10

11 Kate: The problem was that she ate next to nothing. She did everything right.

12 Peter: It's amazing. All of my obese patients belong to the group that tell they never  
13 eat much.

14 Rose: They know they are lying.

15 Peter: Just let them write down what they eat for three days. Make an agreement  
16 about three normal days.  
17  
18  
19

### 20 21 *Reflections about the professional role*

22  
23 The case stories initiated discussions of meta-perspectives. The participants commented on  
24 the storyteller's professional behaviour, and how this behaviour affected the consultations and  
25 the patients. The participants shared professional knowledge concerning medical ethics and  
26 the need to tailor counselling to each patient. Stories about consultations that failed led to  
27 discussions about how to elicit the patient's agenda, the fear of provoking distrust, and the  
28 problem of unintended intimidation of patients when approaching the patients' deeply rooted  
29 habits.  
30  
31

32  
33 Maybe you do everything right. Then you end up by not giving him the responsibility,  
34 in a way. In such a situation I would use the fatalistic part of me, and tell him that he  
35 was responsible. Sometimes maybe we are too eager, and take the responsibility from  
36 the patient. (Male partner)  
37  
38  
39

### 40 41 *Peer support*

42  
43 Several participants told about counselling that failed. This comprised complex situations  
44 when both the doctor and the patient despaired, but also consultations in which the doctors  
45 made proposals or decisions they later regretted. Some expressed significant emotional  
46 involvement and personal disappointment when communication failed, others told about their  
47 own struggle with lifestyle. The participants shared frustration related to insufficient support  
48 from specialized health care, reluctant patients, and difficulties in doctor-patient  
49 communication. Discussing these narratives, peer group members offered care and support,  
50 but they also gave constructive critique and suggested alternative solutions. They often  
51 responded by telling about similar experiences, and argued that doctors should expect limited  
52 success in consultations with patients with complex problems:  
53  
54  
55

56 Rose: I thought about it after she had been there, that fifteen or twenty minutes - she  
57 should have fifteen or twenty minutes to solve each of those problems.  
58  
59  
60

- 1  
2  
3 Jane: It can be too much for a family physician, when specialist health care tells you  
4 to follow up every patient.  
5 Edith: But we should not solve everything. I have low ambitions about solving other  
6 people's health problems.  
7  
8  
9

### 10 *Informal associations*

11  
12  
13 The informal atmosphere in the peer-groups allowed spontaneous associations and proposals,  
14 including suggestions about how to organise health care and ideas about alternative ways of  
15 counselling patients. The participants joked and told anecdotes, triggered by the case  
16 discussions and personal experiences from their own private and professional life. A group of  
17 residents discussed repetitively reminding patients to quit smoking:  
18  
19

- 20  
21 Eric: Just mention smoking when they come in. I think it enhances motivation in the  
22 long run. My dentist has asked me every year if I use fluoride, and I don't. But  
23 the last two months I have used it, because he asked again. He has not done  
24 anything but ask me every time I met him.  
25  
26 Ruth: Same with me, but I have not managed yet.  
27 Peter: Isn't it better to use dental floss?  
28 Eric: But who uses dental floss?  
29 Ruth: I'm thinking about it (laughter).  
30  
31  
32

## 33 **Discussion**

### 34 *Short summary of the main findings*

35  
36  
37  
38 The storyline of case presentations in focus groups included detailed stories with emotional  
39 engagement and co-authoring from other group members. The group interaction initiated  
40 discussions about the patients' and doctors' behaviours and agendas in the consultations,  
41 ethical implications and the handling of clinical problems in everyday practice. The case  
42 stories inspired group members to reflect upon the complexity of counselling and the doctors'  
43 roles. The participants offered each other constructive critique and peer support.  
44  
45  
46

### 47 *Strengths and weaknesses*

48  
49  
50 The presence of the researchers in the focus groups may have influenced what group members  
51 chose to tell.<sup>23</sup> To reduce this influence, the conductor chose a withdrawn position, and  
52 seldom interrupted the group discussions. Being a peer may elicit information that would not  
53 be told to a researcher with a different background,<sup>24</sup> but may also cause blindness to aspects  
54 of the discussions that a researcher with different background would see. This was  
55 compensated to some extent by the presence of an observer with another professional  
56 background. The group members knew each other quite well, and we conducted the group  
57  
58  
59  
60

1  
2  
3 sessions in a scheduled meeting. The participants discussed real case stories from their own  
4 practice. This strengthens the validity of the study. Video recordings would have provided  
5 more information about non-verbal communication, but also increased the possibility of  
6 information overload.  
7

### 8 9 *Dialogical interaction*

10  
11 Some of the case stories followed the traditional, succinct storyline of case presentation, while  
12 expansive stories represented a different genre, with more focus on the patients' life context.  
13 We observed co-authoring during the expansive case presentations. In focus groups the  
14 audience may interact with the speaker by verbal interruption, exclamations, supportive or  
15 confronting utterances, and by non-verbal communication. The speaker may address the  
16 whole group, or a selected person. Moments of 'split floor' discussions occur when different  
17 subgroups speak together. Polyphonic discussions occur when several participants take part in  
18 the same discussion. There may be moments of silence when nobody wants or dares to 'take  
19 the floor'.<sup>25</sup> In this study we observed 'split floor' and polyphonic discussions, but no long  
20 periods of silence. This may be because the participants knew each other well, and the topic  
21 was engaging.  
22  
23  
24  
25

### 26 27 *Frames of interaction*

28  
29 Prepared, condensed presentations represents front stage communication,<sup>26</sup> also described in  
30 studies of morning reports in hospitals.<sup>2,27</sup> In front stage communication the 'actor' plays the  
31 expected role. Front stage communication can be presented to anyone. Detailed case stories  
32 with emotional engagement that admit uncertainty or failure, represent back stage  
33 communication.<sup>26</sup> This is not meant for outsiders, and occurs only in a safe environment.  
34 Professional back stage communication is included in the hidden curriculum of medical  
35 education.<sup>28,29</sup> Humans socialize into groups that share social knowledge and communication.  
36  
37  
38  
39  
40  
41  
42  
43  
44  
45  
46  
47  
48  
49  
50  
51  
52  
53  
54  
55  
56  
57  
58  
59  
60  
Peer groups of general practitioners share professional competence, experience and social  
roles. Socially shared knowledge is formed and maintained through dialogical  
communication, and shapes what is being spoken about and the manner by which contents are  
framed.<sup>7</sup> We observed that this influenced how group members spoke about patients, other  
professionals and governmental institutions.

### 59 60 *An arena for testing out communications strategies*

We noticed spontaneous associations, jokes about patients and anecdotes about controversial  
behaviours of doctors, reflecting an informal, supportive back stage atmosphere and group  
affiliation. We also observed attempts to try out controversial statements. Testing out the  
limits of acceptable behaviour is a frequent strategy in dialogues. While people talk to each  
other, they simultaneously carry out internal dialogues to prepare for positioning themselves  
in the discussion.<sup>7</sup> A participant may not wish to reveal her true opinion, be humiliated or  
step out of the group. This can be solved by using incomplete utterances, jokes, quoting 'third  
parties' and prompting for collaborative utterances.<sup>32</sup> Disrespectful comments about patients  
in some instances initiated constructive critique and a reminder of the ethical behaviour. The

1  
2  
3 discussions addressed moral perception and the ability to identify ethical aspects in clinical  
4 situations.<sup>33</sup> Some participants talked about their own struggle with lifestyle. Several  
5 narratives concerned counselling that failed. The group members trusted each other, and  
6 utilized the peer group as an arena of debriefing and peer support. Brondt et al found that  
7 participation in peer groups as part of CME was associated with decreased risk of professional  
8 dysfunction among Danish GPs.<sup>34</sup>

### 11 *Facilitating person-focused care*

14 The atmosphere in the focus groups was supportive. The participants presented and discussed  
15 case stories in a cautious tone. By presenting their stories, they also presented themselves,  
16 thereby putting their own engagement at stake. The participants discussed patients' behaviour  
17 on a distanced level, but also demonstrated close, personal emotional involvement in patients'  
18 life world, and intentions of exploring patients' agenda. A distinction exists between patient-  
19 centred care and person-focused care. Person-focused care is based on accumulated  
20 knowledge of individuals, which provides the basis for better recognition of health problems  
21 over time, and facilitates appropriate care.<sup>35,36</sup> We have used the concept 'case-based  
22 thinking' to signify how a case-based approach expands the emphasis on medical knowledge  
23 and the clinical problem in question, to encompass the context and the personal and  
24 emotional involvement where only thin layers of distance exist between the general  
25 practitioner and the patient. Dialogues among GPs based on 'case-based thinking' may have  
26 consequences for how GP relate to the clinical problem in question, and to how disagreements  
27 are solved. We only observed moderate competition about being right, and the group  
28 members often asked each other for advice. They often reached mutual agreement, and  
29 discussed ethical implications of their actions.

### 36 *Implications for practice and research*

38 The case stories led to discussions about best practice and exchange of useful tips. The  
39 starting point of the discussions was not theory or research evidence, but clinical experience.  
40 However, in some situations the participants referred to clinical guidelines to solve  
41 disagreements. Peer group meetings are suitable for introduction of attempts to improve  
42 practice skills.<sup>37,38</sup> The storyteller tradition of case stories put clinical problems into context,  
43 and seemed to promote mutual reflections about counselling that might enhance meaning-  
44 making and reflective practice.<sup>39</sup> We still need more information about how doctors think and  
45 learn, and how they develop and change clinical skills. Such information is available from  
46 peer groups of doctors.

### 51 **Conclusion**

54 Presentations and discussions of case stories in peer groups of general practitioners followed a  
55 detailed storyline, and initiated dialogues that highlighted patients' perspectives and  
56 facilitated learning, discussions of best practice and reflections on medical ethics. The safe  
57 backstage atmosphere permitted the general practitioners to express emotions and peer  
58  
59  
60



1  
2  
3 support, and to test out ideas and opinions. The interactions facilitated sense-making and  
4 meaning-making and influenced socially shared knowledge within the group.  
5  
6

### 7 **Acknowledgements**

8 Thanks to the colleagues who participated in the focus groups, and to John Johansen who  
9 assisted as observer in the focus group discussions.  
10

### 11 **Competing interests** None

12  
13  
14 **Contributors** EA and PS prepared the study protocol. EA collected the data. All authors were  
15 involved in analysis, interpretation and drafting the manuscript. EA is the guarantor.  
16

17  
18 **Ethical approval** The study did not involve patients. The doctors presented all case stories  
19 anonymously. The Regional Committee for Ethics in Medical Research regarded the study not  
20 to be within their mandate. All participants signed a declaration of informed consent before  
21 participation.  
22  
23

24 **Funding** The study was supported by the Norwegian Medical Association's Fund for  
25 Research in General Practice.  
26  
27  
28  
29

- 30 1. Matalon A, Calo H, Yaphe J. The role of the staff meeting in resolving professional dilemmas in  
31 family medicine: concealing a diagnosis. *Eur J Gen Pract* 2004;10(1):35-6, 40.
- 32 2. Apker J, Eggly S. Communicating professional identity in medical socialization: considering the  
33 ideological discourse of morning report. *Qual Health Res* 2004;14(3):411-29.
- 34 3. Anspach RR. Notes on the sociology of medical discourse: the language of case presentation. *J*  
35 *Health Soc Behav* 1988;29(4):357-75.
- 36 4. Hill RF, Tyson EP, Riley HD, Jr. The culture of morning report: ethnography of a clinical teaching  
37 conference. *South Med J* 1997;90(6):594-600.
- 38 5. Gross CP, Donnelly GB, Reisman AB, et al. Resident expectations of morning report: a multi-  
39 institutional study. *Arch Intern Med* 1999;159(16):1910-4.
- 40 6. Charon R. *Narrative medicine: Honoring the Stories of Illness*. Oxford: Oxford University Press,  
41 2006.
- 42 7. Marková I. Dialogism: interaction, social knowledge and dialogue. In: Marková I, editor. *Dialogue in*  
43 *focus groups*. London: Equinox Publishing Ltd, 2007.
- 44 8. Rommetveit R. *On message structure: A framework for the study of language and communication*.  
45 London and New York: Wiley, 1974.
- 46 9. Malhotra A, Gregory I, Darvill E, et al. Mind the gap: Learners' perspectives on what they learn in  
47 communication compared to how they and others behave in the real world. *Patient Educ*  
48 *Couns* 2009;76(3):385-90.
- 49 10. Srinivasan M, Wilkes M, Stevenson F, et al. Comparing problem-based learning with case-based  
50 learning: effects of a major curricular shift at two institutions. *Acad Med* 2007;82(1):74-82.
- 51 11. Launer J. Moving on from Balint: embracing clinical supervision. *Br J Gen Pract* 2007;57(536):182-  
52 3.  
53
- 54 12. Treweek S, Flottorp S, Fretheim A, et al. Hva gjør fastleger for å holde seg faglig oppdatert? [What  
55 do general practitioners do to keep themselves up to date?]. *Tidsskr Nor Laegeforen*  
56 2005;125(3):304-6.  
57  
58  
59  
60

13. Rabinowitz S, Maoz B, Weingarten M, et al. Listening to patients' stories. Storytelling approach in family medicine. *Can Fam Physician* 1994;40:2098-102.
14. Premi J, Shannon S, Hartwick K, et al. Practice-based small-group CME. *Acad Med* 1994;69(10):800-2.
15. Armson H, Kinzie S, Hawes D, et al. Translating learning into practice: lessons from the practice-based small group learning program. *Can Fam Physician* 2007;53(9):1477-85.
16. Pereles L, Lockyer J, Fidler H. Permanent small groups: group dynamics, learning, and change. *J Contin Educ Health Prof* 2002;22(4):205-13.
17. Peloso PM, Stakiw KJ. Small-group format for continuing medical education: a report from the field. *J Contin Educ Health Prof* 2000;20(1):27-32.
18. Eliasson G, Mattsson B. From teaching to learning. Experiences of small CME group work in general practice in Sweden. *Scand J Prim Health Care* 1999;17(4):196-200.
19. Abildsnes E, Walseth LT, Flottorp SA, et al. Lifestyle consultation in general practice--the doctor's toolbox: a qualitative focus group study. *Fam Pract* 2011;28(2):220-5.
20. Bradley CP. Turning anecdotes into data--the critical incident technique. *Fam Pract* 1992;9(1):98-103.
21. Miller WL, Crabtree BJ. Clinical research. A multimethod typology and qualitative roadmap. . *Doing Qualitative Research*. 2 ed. Thousand Oaks, CA: Sage, 1999:20-24.
22. Malterud K. Shared understanding of the qualitative research process. Guidelines for the medical researcher. *Fam Pract* 1993;10(2):201-6.
23. Coar L, Sim J. Interviewing one's peers: methodological issues in a study of health professionals. *Scand J Prim Health Care* 2006;24(4):251-6.
24. Chew-Graham CA, May CR, Perry MS. Qualitative research and the problem of judgement: lessons from interviewing fellow professionals. *Fam Pract* 2002;19(3):285-9.
25. Gossen M. Dialogical analyses of focus groups: data and analytical approaches. In: Marková I, editor. *Dialogue in focus groups*. London: Equinox Publishing Ltd, 2007.
26. Goffman E. *The Presentation of Self in Everyday Life*. New York: Doubleday, 1959.
27. Mishler EG. *Discourse of medicine: Dialectics of medical interview*. Norwood, NJ: Ablex, 1884.
28. Wear D, Aultman JM, Varley JD, et al. Making fun of patients: medical students' perceptions and use of derogatory and cynical humor in clinical settings. *Acad Med* 2006;81(5):454-62.
29. Bennett N, Lockyer J, Mann K, et al. Hidden curriculum in continuing medical education. *J Contin Educ Health Prof* 2004;24(3):145-52.
30. Weber M. *Wirtschaft und Gesellschaft*. Tübingen: J.B.C. Mohr, 1976.
31. Bourdieu P. *Meditasjoner (Méditations pascaliennes)*. Oslo: Pax forlag A/S, 1999.
32. Marková I. Themata in dialogue: taking social knowledge as shared. In: Marková I, editor. *Dialogue in focus groups*. London: Equinox Publications Ltd, 2007.
33. Vetlesen AJ. *Perception, empathy, and judgement: An Inquiry into the Preconditions of Moral Performance*. University park, PA: The Pennsylvania University Press, 1994.
34. Brondt A, Sokolowski I, Olesen F, et al. Continuing medical education and burnout among Danish GPs. *Br J Gen Pract* 2008;58(546):15-9.
35. Starfield B. Is patient-centered care the same as person-focused care? *Perm J* 2011;15(2):63-9.
36. Meador BT, Rogers C. Person-centered therapy. In: Corsini RJ, editor. *Current psychotherapies*. 2 ed. Itasca, Illinois: F.E.Peacock Publishers, 1979:131-84.
37. Frich JC, Hoyer S, Lindbaek M, et al. General practitioners and tutors' experiences with peer group academic detailing: a qualitative study. *BMC Fam Pract* 2010;11:12.
38. Straand J, Fetveit A, Rognstad S, et al. A cluster-randomized educational intervention to reduce inappropriate prescription patterns for elderly patients in general practice--The Prescription Peer Academic Detailing (Rx-PAD) study [NCT00281450]. *BMC Health Serv Res* 2006;6:72.
39. Schön DA. *Educating the Reflective Practitioner. Toward a new design for teaching and learning in the professions*. San Fransisco: Jossey-Bass, 1987.

1  
2  
3  
4  
5  
6  
7  
8  
9  
10  
11  
12  
13  
14  
15  
16  
17  
18  
19  
20  
21  
22  
23  
24  
25  
26  
27  
28  
29  
30  
31  
32  
33  
34  
35  
36  
37  
38  
39  
40  
41  
42  
43  
44  
45  
46  
47  
48  
49  
50  
51  
52  
53  
54  
55  
56  
57  
58  
59  
60

Case stories in small-group activity in general practice: A focus group study, from  
backstage

Eirik Abildsnes, Signe Flottorp, Per Stensland

Department of Public Health and Primary Health Care, University of Bergen, N-5020 Bergen,  
Norway Eirik Abildsnes

research fellow Norwegian Knowledge Centre for the Health Services, N-0130 Oslo, Norway

Signe Flottorp

senior researcher Department of Public Health and Primary Health Care, University of Bergen

Per Stensland

associate professor

Correspondence to: E Abildsnes eabil@broadpark.no

1  
2  
3  
4  
5  
6  
7 **Case stories in small-group activity in general practice: A focus group study from**  
8 **backstage.**  
9

## 10 Abstract

11 **Objectives** To explore the interactive process of sharing case stories in small-group activity in  
12 general practice.

13 **Design** Qualitative focus group study.

14 **Setting** Peer group meetings of doctors attending specialist training or continuous medical  
15 education in general practice.

16 **Participants** Twenty female and 30 male doctors working in general practice in Norway.

17 **Results** The storyline of case presentations included detailed stories with emotional  
18 engagement, co-authored by other group members. The stories initiated discussions and  
19 reflections concerning patients' and doctors' perspectives, medical ethics as well as clinical  
20 problems. The safe atmosphere allowed testing out boundaries of socially shared knowledge.

21 **Conclusions** Sharing case stories in small-groups in general practice initiated interaction that  
22 facilitated meaning-making, reflection and peer support.  
23  
24  
25  
26

## 27 Article summary

### 28 Article focus

- 29 • Sharing case stories have longstanding traditions among doctors. General practitioners  
30 share case stories in small-group learning.
- 31 • Socially shared knowledge is formed and maintained through dialogical thinking and  
32 communication, and affects what is being talked about and the manner by which  
33 content is framed.
- 34 • We intended to explore the interactive process of discussing case stories in peer  
35 groups of general practitioners.  
36  
37  
38  
39

### 40 Key messages

- 41 • Case presentations in focus groups included detailed stories with emotional  
42 engagement and co-authoring from other group members.
- 43 • ~~The case stories initiated~~ Group interaction initiated discussions facilitating attention  
44 to person-focused care. about the patients' and doctors' behaviours and agendas,  
45 ethical implications and the handling of clinical problems in everyday practice.
- 46 • ~~Case story discussions in small-group learning functioned as an arena for testing out~~  
47 communication strategies to be used in consultations. inspired group members to  
48 reflect upon the complexity of counselling and the doctors' roles. The participants  
49 offered each other critique and peer support.  
50  
51

### 52 Strengths and limitations

53  
54  
55  
56  
57  
58  
59  
60

- The presence of the researchers influenced what group members chose to tell.
- Being a peer may cause blindness to aspects of the discussions that a researcher with different background would see.
- The participants discussed real case stories from their own practice.

## Introduction

Case stories have a longstanding traditions in medicine. Doctors share case stories when referring patients to hospital from primary health care, at morning reports in hospital, and when discussing interesting or difficult cases.<sup>1,2</sup> Case stories include everyday practice, dramatic “war stories” and anecdotes of uncommon practice. The stories aim to provide a professional audience with succinct and sufficient information to understand the specific clinical problem.<sup>3</sup> Doctors adopt the medical storyline of case presentations early in their career. During case presentations students, interns and residents improve knowledge based on clinical experience, and learn the medical language, professional principles, traditions and values.<sup>4</sup> Their supervisors evaluate their presentations based on relevance, conciseness and mastery of the medical language.<sup>5</sup> Patients adjust their illness narratives to the listening doctor,<sup>6</sup> Doctors adjust their retelling and interpretations of the patients’ stories into case stories suitable for a professional audience.<sup>6,7</sup>

Peer groups of general practitioners share professional competence, experience and social role. Such socially shared knowledge has an interactive nature. It is formed and maintained through dialogical thinking and communication, and determines affects what is being talked about and the manner by which content is framed.<sup>7,8</sup> It influences how group members speak about others, such as patients, other professionals or health authorities. Dialogues involve tension and intentions, and dealing with this implicit shared knowledge within a group is an important social skill.<sup>8,9</sup> The distribution of this competence within a group may affect group dynamics, and the outcome of group discussions. Communication is affected by fear of losing face, indirect communication and hidden agendas. Group While group members talk to each other, they may simultaneously carry out unspoken, internal dialogues with themselves or othersto try out their communication strategies before they take part in the spoken discussion.<sup>7,8</sup>

Research on the development of doctors’ communication patterns emphasizes that medical education, internship and residency influence doctors’ identities in ways that affect communication with patients.<sup>9,10</sup> Case-based teaching is used along with problem-based teaching in medical education, and is well suited for small-group teaching.<sup>10,11</sup> Problem-based teaching focuses on a particular clinical problem, while case-based teaching focuses on a particular patient presenting with a clinical problem. In general practice case-based learning in organized peer groups is widely used.<sup>11-14,12-15</sup> Permanent small-group activities have become an important part of CME in many countries, and if well functioning can serve as supportive networks to share knowledge and clinical experience.<sup>15-18,16-19</sup>

Field Code Changed

1  
2  
3  
4  
5  
6  
7 ~~The primary aim of the research project was to study general practitioners' experience with~~  
8 ~~lifestyle counselling.~~ While conducting focus group sessions among general practitioners to  
9 study general practitioners' experience with lifestyle counselling,<sup>19,20</sup> we observed interesting  
10 interaction within the groups, ~~and decided to explore this interaction in detail.~~ We have not  
11 identified studies that explore the interactive process of discussing case stories. The aim of  
12 this paper is to explore and describe how-in peer groups of general practitioners interact when  
13 they share and discuss case stories, ~~and aimed to do so in this paper.~~

Field Code Changed

## 14 15 16 17 18 19 20 21 22 23 24 25 26 27 28 29 30 31 32 33 34 35 36 37 38 39 40 41 42 43 44 45 46 47 48 49 50 51 52 53 54 55 56 57 58 59 60

### Methods

In Norway interns spend six months of their internship in general practice, and they attend to  
supervised peer groups in these months. In specialist training in general practice, residents  
(specialist candidates) attend to three years of participation in supervised peer groups while  
they work in general practice. All partners (specialists in general practice, practicing  
physicians) attend to peer groups as a mandatory part of continuous medical education. In  
Norway it is required to recertify as specialist in general practice every fifth year. All  
groups meet four to six times a year, each meeting lasts two to three hours.

We invited seven established peer groups from the southern part of Norway to attend focus group sessions on lifestyle counselling. We used strategic sampling to obtain information from doctors with as varied background and experience as possible. Six groups accepted the invitation, one group did not answer. Two groups of interns (17 participants), one group of residents (eight participants) and two groups of partners (13 participants) attended. The last~~One~~ group consisted of three residents and nine partners. ~~Partners were specialists in general practice. Groups of interns and residents have a supervisor.~~ The supervisor of interns and residents did not participate in the focus group sessions. The participants included 20 female and 30 male doctors. Twenty-nine had graduated from Norwegian medical schools, 21 had graduated from medical schools in seven ~~other~~different European countries. Among the ~~partners~~specialists, 16 had worked more than ten years as a specialist in general practice~~family medicine~~. Eighteen physicians practiced in rural communities with less than 10 000 inhabitants. These participants did not differ from the rest with respect to background and clinical experience. Twenty-one worked in communities with between 10 000 and 20 000 inhabitants, while 11 worked in towns with more than 20 000 inhabitants. One participant practiced ~~alonesole~~, the rest worked in group practices.

Having conducted six groups with 50 physicians, we experienced data saturation regarding the topic on lifestyle counselling. We realised that we also had abundant examples of group interactions regarding the case story discussions.

To initiate a dialogue in the focus groups we used the Critical Incident Technique.<sup>2021</sup> According to this procedure, we invited the participants to present case stories from their own practice about lifestyle counselling which ended up as either a success or a failure. The group members commented on each story, and told about similar or contrasting experiences. We used no interview guide. The first author audio-taped and conducted the group sessions and

made field notes at the end of each session to supply transcripts. An observer, a sports scientist, also made field notes, summarized his impressions, and asked for comments at the end of each session to avoid misunderstandings. We considered audiotape recordings ~~to provide sufficient information as an acceptable basis~~ to study verbal interaction.

The first author, an experienced general practitioner, transcribed the audio-tapes verbatim. We used Systematic Text Condensation and an editing analysis style in analysis. ~~21 2222-23~~ Bracketing preconceptions, we first read the material searching for an overall impression. The first and third author independently examined the text for units of meaning representing interaction and process in the presentation and discussion of case stories. We coded and grouped these units, contrasted and abstracted the content in each group, and finally discussed and summarised the content of each group into generalised descriptions of aspects of interaction. If illustrating quotes included more than one participant, we used fictitious names to identify the participants.

~~We analysed interactions among the participants when they presented and discussed case stories about lifestyle counselling.~~

## Results

~~We analysed interactions among the participants when they presented and discussed case stories about lifestyle counselling.~~

### *A different storyline of case presentations*

Some of the participants ~~presented~~ referred condensed case histories, focusing on objective data including results of measurements, laboratory tests and supplementary investigations. They described treatment outcomes in a similar brief and objective way. The other group members seldom interrupted these presentations, but asked questions and made comments after the case presentation. Other stories were more detailed and expansive. In these sequences the storytellers presented their own attitudes, emotions and reflections as well as their patients'. The other group members often made comments and asked questions during these detailed case presentations, and in this way co-authored the story narrative. These stories often involved other aspects of the patients' histories than the particular medical problem in question. Tom, an experienced partner, told about his strategy when talking to patients who relapsed after smoking cessation:

Tom: I try to motivate those who have quit smoking, and remind them that it is great that they have managed to quit. Don't forget it.

Ben: Many times, and for those who have had a relapse, remind them that they have succeeded once.

Sandra: Yes, that's right. Focus on what you [the patient] did to succeed.

Tom: Focus on what went wrong, what happened, and how we can prevent it from

1  
2  
3  
4  
5  
6  
7 happening again.

8  
9  
10 Formatted: Indent: Left: 0", First line: 0"

### 11 *Discussing and solving disagreements*

12 The case stories elicited discussions about how to handle clinical problems, the feasibility of  
13 clinical guidelines, checklists and evidence based medicine. The participants carefully  
14 suggested different counselling approaches, their own experience in similar situations and  
15 commented politely on the proposals suggested. When disagreements occurred, we observed  
16 moderate competition about being right, but the groups often reached mutual agreement. A  
17 few times disagreement was solved by referring to clinical guidelines. The participants often  
18 asked the rest of the group for advice, reflected upon ethical implications and discussed  
19 cooperation with other healthcare providers. John, a male resident told a ~~story~~narrative about  
20 treating a patient with obesity:  
21

22 Kate: You measured weight now and then?

23 John: Yes, in the beginning we did. We observed a nice reduction. It was the start of  
24 a successful story which is unusual.

25 Conductor: What do you think about measuring weight in such consultations?

26 Kate: I actually ask the patients about that, whether they want to be weighed or not. I  
27 think weighing is ambiguous, get stuck to numbers. Weight does not always  
28 tell you about how the body changes.

29 John: Use waist circumference.  
30  
31

32 Formatted: Indent: Left: 0"

### 33 *Case-based thinking*

34 The case presentations initiated detailed discussions about the patients' agendas. The  
35 participants discussed what they believed to be the particular patient's expectations about the  
36 consultation, and the doctor's involvement. Some compared their patients' situation with their  
37 own. The storyteller explained the sources of the patients' motivation for change of lifestyle,  
38 and gave background information about the patients' experiences and identity beyond the  
39 medical problem in question. The groups discussed how this information could be utilised in  
40 the consultation.  
41

42 I had a patient ~~who~~that actually succeeded in losing weight. She was about 35 years  
43 old. What made her succeed was that abdominal plastic surgery to remove excessive  
44 skin folds should be paid for when her body mass index was normalised. That was her  
45 motivation, to be operated and being able to wear bikini again. (Female resident)  
46  
47  
48  
49

50 Detailed information about the patients initiated reflections among group members about the  
51 complexity of many patients' lives, their self-efficacy and motivation for lifestyle change  
52 despite these constraints. Several expressed respect and admiration of how their patients  
53 managed ~~their~~ lives.  
54  
55  
56  
57  
58  
59  
60



1  
2  
3  
4  
5  
6  
7 It is actually fascinating how much power that might be hidden behind rather poor  
8 facades. A complicated family situation, severe obesity, unemployment. Actually  
9 problems from A to Z. (female partner)

10  
11 Some participants defended their patients if other group members criticised or made jokes  
12 about ~~them~~their patients during case discussions. Paula, a female intern presented a case story  
13 of a man taking anabolic steroids:

14 Ann: What kind of education or work did he have?

15 Paula: I don't remember.

16 Ann: Security guard, maybe?

17 Mike: You are rather stereotype!

18 Ann: No, do you think he had any education?

19 Paula: No, I don't think so, but he was employed in sales business. He seemed quite  
20 bright when I talked to him.  
21  
22

23  
24 In other situations, the doctors supported each other's denigration of patients, ~~and made jokes~~  
25 ~~about them~~. Some case stories included patients who did not comply with the doctors'  
26 proposals, even when non-compliance would imply a serious threat to the patient's health.  
27 The participants commented on how patients fooled themselves, made unwise decisions or  
28 proposed too easy solutions to solve complex problems. A group of partners discussed  
29 patients' self reported dietary habits:  
30

31 Kate: The problem was that she ate next to nothing. She did everything right.

32 Peter: It's amazing. All of my obese patients belong to the group that tell they never  
33 eat much.

34 Rose: They know they are lying.

35 Peter: Just let them write down what they eat for three days. Make an agreement  
36 about three normal days.  
37  
38

39  
40 *Reflections about the professional role*  
41

42 The case stories initiated discussions of meta-perspectives. The participants commented on  
43 the storyteller's professional behaviour, and how this behaviour affected the consultations and  
44 the patients. The participants shared professional knowledge concerning medical ethics and  
45 the need to tailor counselling to each patient. Stories about consultations that failed led to  
46 ~~elicited~~ discussions about how to elicit the patient's agenda, the fear of provoking distrust,  
47 and the problem of unintended intimidation of patients when approaching the patients' deeply  
48 rooted habits.  
49  
50

51 Maybe you do everything right. Then you end up by not giving him the responsibility,  
52 in a way. In such a situation I would use the fatalistic part of me, and tell him that he  
53 was responsible. Sometimes maybe we are too eager, and take the responsibility from  
54  
55  
56  
57  
58  
59  
60

1  
2  
3  
4  
5  
6  
7 the patient. (Male partner)  
8  
9

Formatted: Indent: Left: 0.49"

### 10 *Peer support*

11  
12 Several participants told about counselling that failed. This comprised complex situations  
13 when both the doctor and the patient despaired, but also consultations in which the doctors  
14 made proposals or decisions they later regretted. Some expressed significant emotional  
15 involvement and personal disappointment when communication failed, others told about their  
16 own struggle with lifestyle. The participants shared frustration related to insufficient support  
17 from specialized health care, reluctant patients, and difficulties in doctor-patient  
18 communication. Discussing these narratives, peer group members offered care and support,  
19 but they also gave constructive critique and suggested alternative solutions. They often  
20 responded by telling about similar experiences, and argued that doctors should expect limited  
21 success in ~~complex~~ consultations with patients with complex problems:  
22  
23

24 Rose: I thought about it after she had been there, that fifteen or twenty minutes - she  
25 should have fifteen or twenty minutes to solve each of those problems.

26 Jane: It can be too much for a family physician, when specialist health care tells you  
27 to follow up every patient.

28 Edith: But we should not solve everything. I have low ambitions about solving other  
29 people's health problems.  
30  
31  
32

### 33 *Informal associations*

34  
35 The informal atmosphere in the peer-groups allowed spontaneous associations and proposals,  
36 including suggestions about how to organise health care and ideas about alternative ways of  
37 counselling patients. The participants joked and told anecdotes, triggered by the case  
38 discussions and associations-personal experiences from their own private and professional  
39 life. A group of residents discussed repetitively reminding patients to quit smoking:  
40  
41

42 Eric: Just mention smoking when they come in. I think it enhances motivation in the  
43 long run. My dentist has asked me every year if I use fluoride, and I don't. But  
44 the last two months I have used it, because he asked again. He has not done  
45 anything but ask me every time I met him.

46 Ruth: Same with me, but I have not managed yet.

47 Peter: Isn't it better to use dental floss?

48 Eric: But who uses dental floss?

49 Ruth: I'm thinking about it (laughter).  
50  
51  
52

### 53 **Discussion**

54  
55  
56  
57  
58  
59  
60

### Short summary of the main findings

The storyline of case presentations in focus groups included detailed stories with emotional engagement and co-authoring from other group members. The group interaction initiated discussions about the patients' and doctors' behaviours and agendas in the consultations, ethical implications and the handling of clinical problems in everyday practice. The case stories inspired group members to reflect upon the complexity of counselling and the doctors' roles. The participants offered each other constructive critique and peer support.

### Strengths and weaknesses

The presence of the researchers in the focus groups may have influenced what group members chose to tell. <sup>2324</sup> To reduce this influence, the conductor chose a withdrawn position, and seldom interrupted the group discussions. Being a peer may elicit information that would not be told to a researcher with a different background, <sup>2425</sup> but may also cause blindness to aspects of the discussions that a researcher with different background would see. This was compensated to some extent by the presence of an observer with another professional background. The group members knew each other quite well, and we conducted the group sessions in a scheduled meeting. The participants discussed real case stories from their own practice. This strengthens the validity of the study. Video recordings would have provided more information about non-verbal communication, but also increased the possibility of information overload.

### Dialogical interaction

Some of the case stories followed the traditional, succinct storyline of case presentation, while expansive stories represented a different genre, withenecompassing more focus on the patients' life context. We observed co-authoring during the expansive case presentations. In focus groups the audience may interact withsupply the speaker by verbal interruption, exclamations, supportive or confronting utterances, and by non-verbal communication. The speaker may address the whole group, or a selected person. Moments of 'split floor' discussions occur when different subgroups speak together. Pand polyphonic discussions occur when several participants take part in the same discussion. There may be moments of silence when ,as well as moments in which nobody wants or dares to 'take the floor'. <sup>2526</sup> In this study we observed 'split floor' and polyphonic discussions, but never no long periods of silencemoments when nobody 'took the floor'. This may be because the participants knew each other well, and the topic was engaging.

### Frames of interaction

Prepared, condensed presentations represents front stage communication, <sup>2627</sup> also described in studies of morning reports in hospitals. <sup>2728</sup> In front stage communication the 'actor' plays the expected role. Front stage communication can be presented to anyone. Detailed case stories with emotional engagement that admit uncertainty or failure, represent back stage

Field Code Changed

communication.<sup>2627</sup> This is not meant for outsiders, and ~~only occurs~~ only in a safe environment. Professional back stage communication is included in the hidden curriculum of medical education, ~~supports each group member and strengthens group affiliation.~~<sup>28,2929-30</sup> Humans socialize into groups that share social knowledge and communication.<sup>30,3131-32</sup> Peer groups of general practitioners share professional competence, experience and social roles. Socially shared knowledge is formed and maintained through dialogical communication, and shapes what is being spoken about and the manner by which contents are framed.<sup>78</sup> We observed that this influenced how group members spoke about patients, other professionals and governmental institutions.

Field Code Changed

Field Code Changed

Field Code Changed

### *An arena for testing out communications strategies*

We noticed spontaneous associations, jokes about patients and anecdotes about controversial behaviours of doctors, reflecting an informal, supportive back stage atmosphere and group affiliation. We also observed attempts to try out controversial statements. Testing out the limits of acceptable behaviour is a frequent strategy in dialogues. While people talk to each other, they simultaneously carry out internal dialogues ~~with themselves or others to~~ prepare for positioning themselves in the discussion.<sup>78</sup> A participant may not wish to reveal her true opinion, be humiliated or step out of the group. This can be solved by using incomplete utterances, jokes, quoting 'third parties' and prompting for collaborative utterances.<sup>3233</sup> Disrespectful comments about patients in some instances initiated constructive critique and a reminder of the ethical behaviour. The discussions addressed moral perception and the ability to identify ethical aspects in clinical situations.<sup>3334</sup> Some participants ~~talked~~ told about their own struggle with lifestyle. Several narratives concerned counselling that failed. The group members ~~obviously~~ trusted each other, and utilized the peer group as an arena of debriefing and peer support. Brondt et al ~~found~~ showed that participation in peer groups as part of CME was associated with decreased risk of professional dysfunction among Danish GPs.<sup>3435</sup>

Field Code Changed

Field Code Changed

Field Code Changed

Field Code Changed

### *Facilitating person-focused care*

The atmosphere in the focus groups was supportive. The participants presented and discussed case stories in a cautious tone. By presenting their stories, they also presented themselves, thereby putting their own engagement at stake. The participants discussed patients' behaviour on a distanced level, but also demonstrated close, personal emotional involvement in patients' life world, and intentions of exploring patients' agenda. A distinction exists between patient-centred care and person-focused care. The latter has a (much) broader, encompassing focus. Person-focused care is based on accumulated knowledge of individuals/people, which provides the basis for better recognition of health problems and needs over time, and facilitates appropriate care for these needs in the context of other needs.<sup>35,3636-37</sup> We have used the concept 'case-based thinking' to signify how a case-based ~~narrative~~ approach expands the emphasis on medical knowledge and the clinical medical problem in question, to encompass the context and the, personal and emotional involvement where only thin layers of distance exist between the general practitioner and the patient. ~~A distinction exists between patient-centred care and person-focused care. The latter has a much broader, encompassing focus.~~

1  
2  
3  
4  
5  
6  
7  
8  
9  
10  
11  
12  
13  
14  
15  
16  
17  
18  
19  
20  
21  
22  
23  
24  
25  
26  
27  
28  
29  
30  
31  
32  
33  
34  
35  
36  
37  
38  
39  
40  
41  
42  
43  
44  
45  
46  
47  
48  
49  
50  
51  
52  
53  
54  
55  
56  
57  
58  
59  
60

~~Person focused care is based on accumulated knowledge of people, which provides the basis for better recognition of health problems and needs over time, and facilitates appropriate care for these needs in the context of other needs.~~<sup>36-37</sup> Dialogues among GPs based on 'case-based thinking' may have consequences for how GP relate to the clinical problem in question, and to how disagreements are solved. We only observed moderate competition about being right, and the group members often asked each other for advice. They often reached mutual agreement, and discussed ethical implications of their actions.

#### Implications for practice and research

The ~~case stories led to group interaction initiated~~ discussions about best practice, and exchange of ~~useful practical~~ tips. The starting point of the discussions was not theory or ~~research~~ evidence, but clinical experience. However, in some situations the participants referred to clinical guidelines to solve disagreements. Peer group meetings are suitable for introduction of attempts to improve practice skills.<sup>37 38 39</sup> The storyteller tradition of case stories put clinical problems into context, and seemed to promote mutual reflections about counselling that might enhance meaning-making and reflective practice.<sup>39 40</sup> We still need more information about how doctors think and learn, and how they develop and change clinical skills. Such information is available from peer groups of doctors.

Field Code Changed

Field Code Changed

#### **Conclusion**

Presentations and discussions of case stories in peer groups of general practitioners followed a detailed storyline, and initiated dialogues that highlighted patients' perspectives and facilitated learning, discussions of best practice and reflections on medical ethics. The safe backstage atmosphere permitted the general practitioners to expression of emotions and, peer support, and to testing out ideas and opinions. The interactions facilitated sense-making and meaning-making ~~and activity that~~ influenced socially shared knowledge within the group.

#### **Acknowledgements**

Thanks to the colleagues who participated in the focus groups, and to John Johansen who assisted as observer in the focus group discussions.

#### **Competing interests** None

**Contributors** EA and PS prepared the study protocol. EA collected the data. All authors were involved in analysis, interpretation and drafting the manuscript. EA is the guarantor.

**Ethical approval** The study did not involve patients. The doctors presented all case stories anonymously. The Regional Committee for Ethics in Medical Research regarded the study not to be within their mandate. All participants signed a declaration of informed consent before participation.

**Funding** The study was supported by the Norwegian Medical Association's Fund for Research in General Practice.

1. Matalon A, Calo H, Yaphe J. The role of the staff meeting in resolving professional dilemmas in family medicine: concealing a diagnosis. *Eur J Gen Pract* 2004;10(1):35-6, 40.
2. Apker J, Eggly S. Communicating professional identity in medical socialization: considering the ideological discourse of morning report. *Qual Health Res* 2004;14(3):411-29.
3. Anspach RR. Notes on the sociology of medical discourse: the language of case presentation. *J Health Soc Behav* 1988;29(4):357-75.
4. Hill RF, Tyson EP, Riley HD, Jr. The culture of morning report: ethnography of a clinical teaching conference. *South Med J* 1997;90(6):594-600.
5. Gross CP, Donnelly GB, Reisman AB, Sepkowitz KA, Callahan MA. Resident expectations of morning report: a multi-institutional study. *Arch Intern Med* 1999;159(16):1910-4.
6. Charon R. *Narrative medicine: Honoring the Stories of Illness*. Oxford: Oxford University Press, 2006.
7. Marková I. Dialogism: interaction, social knowledge and dialogue. In: Marková I, editor. *Dialogue in focus groups*. London: Equinox Publishing Ltd, 2007.
8. Rommetveit R. *On message structure: A framework for the study of language and communication*. London and New York: Wiley, 1974.
9. Malhotra A, Gregory I, Darvill E, Goble E, Pryce-Roberts A, Lundberg K, et al. Mind the gap: Learners' perspectives on what they learn in communication compared to how they and others behave in the real world. *Patient Educ Couns* 2009;76(3):385-90.
10. Srinivasan M, Wilkes M, Stevenson F, Nguyen T, Slavin S. Comparing problem-based learning with case-based learning: effects of a major curricular shift at two institutions. *Acad Med* 2007;82(1):74-82.
11. Launer J. Moving on from Balint: embracing clinical supervision. *Br J Gen Pract* 2007;57(536):182-3.
12. Treweek S, Flottorp S, Fretheim A, Havelrud K, Kristoffersen DT, Oxman A, et al. Hva gjør fastleger for å holde seg faglig oppdatert? [What do general practitioners do to keep themselves up to date?]. *Tidsskr Nor Laegeforen* 2005;125(3):304-6.
13. Rabinowitz S, Maoz B, Weingarten M, Kasan R. Listening to patients' stories. Storytelling approach in family medicine. *Can Fam Physician* 1994;40:2098-102.
14. Premi J, Shannon S, Hartwick K, Lamb S, Wakefield J, Williams J. Practice-based small-group CME. *Acad Med* 1994;69(10):800-2.
15. Armon H, Kinzie S, Hawes D, Roder S, Wakefield J, Elmslie T. Translating learning into practice: lessons from the practice-based small group learning program. *Can Fam Physician* 2007;53(9):1477-85.
16. Pereles L, Lockyer J, Fidler H. Permanent small groups: group dynamics, learning, and change. *J Contin Educ Health Prof* 2002;22(4):205-13.
17. Peloso PM, Stakiw KJ. Small-group format for continuing medical education: a report from the field. *J Contin Educ Health Prof* 2000;20(1):27-32.
18. Eliasson G, Mattsson B. From teaching to learning. Experiences of small CME group work in general practice in Sweden. *Scand J Prim Health Care* 1999;17(4):196-200.
19. Abildsnes E, Walseth LT, Flottorp SA, Stensland PS. Lifestyle consultation in general practice--the doctor's toolbox: a qualitative focus group study. *Fam Pract* 2011;28(2):220-5.
20. Bradley CP. Turning anecdotes into data--the critical incident technique. *Fam Pract* 1992;9(1):98-103.
21. Miller WL, Crabtree BJ. *Clinical research. A multimethod typology and qualitative roadmap*. *Doing Qualitative Research*, 2 ed. Thousand Oaks, CA: Sage, 1999:20-24.

Formatted: Font: Calibri, 11 pt

Formatted: Font: Calibri, 11 pt, Italic

Formatted: Font: Calibri, 11 pt

Formatted: Font: Calibri, 11 pt, Italic

Formatted: Font: Calibri, 11 pt

Formatted: Font: Calibri, 11 pt, Italic

Formatted: Font: Calibri, 11 pt

Formatted: Font: Calibri, 11 pt, Italic

Formatted: Font: Calibri, 11 pt

Formatted: Font: Calibri, 11 pt, Italic

Formatted: Font: Calibri, 11 pt

Formatted: Font: Calibri, 11 pt, Italic

Formatted: Font: Calibri, 11 pt

Formatted: Font: Calibri, 11 pt, Italic

Formatted: Font: Calibri, 11 pt

Formatted: Font: Calibri, 11 pt, Italic

Formatted: Font: Calibri, 11 pt

Formatted: Font: Calibri, 11 pt, Italic

Formatted: Font: Calibri, 11 pt

Formatted: Font: Calibri, 11 pt, Italic

Formatted: Font: Calibri, 11 pt

Formatted: Font: Calibri, 11 pt, Italic, English (U.S.)

Formatted: Font: Calibri, 11 pt, English (U.S.)

Formatted: Font: Calibri, 11 pt

Formatted: Font: Calibri, 11 pt, Italic

Formatted: Font: Calibri, 11 pt

Formatted: Font: Calibri, 11 pt, Italic

Formatted: Font: Calibri, 11 pt

Formatted: Font: Calibri, 11 pt, Italic

Formatted: Font: Calibri, 11 pt

Formatted: Font: Calibri, 11 pt, Italic

Formatted: Font: Calibri, 11 pt

Formatted: Font: Calibri, 11 pt, Italic

Formatted: Font: Calibri, 11 pt

Formatted: Font: Calibri, 11 pt, Italic

Formatted: Font: Calibri, 11 pt

Formatted: Font: Calibri, 11 pt, Italic

Formatted: Font: Calibri, 11 pt

Formatted: Font: Calibri, 11 pt, Italic

Formatted: Font: Calibri, 11 pt

Formatted: Font: Calibri, 11 pt, Italic

Formatted: Font: Calibri, 11 pt

Formatted: Font: Calibri, 11 pt, Italic

Formatted: Font: Calibri, 11 pt

Formatted: Font: Calibri, 11 pt, Italic

Formatted: Font: Calibri, 11 pt

1  
2  
3  
4  
5  
6  
7  
8  
9  
10  
11  
12  
13  
14  
15  
16  
17  
18  
19  
20  
21  
22  
23  
24  
25  
26  
27  
28  
29  
30  
31  
32  
33  
34  
35  
36  
37  
38  
39  
40  
41  
42  
43  
44  
45  
46  
47  
48  
49  
50  
51  
52  
53  
54  
55  
56  
57  
58  
59  
60

22. Malterud K. Shared understanding of the qualitative research process. Guidelines for the medical researcher. *Fam Pract* 1993;10(2):201-6.
23. Coar L, Sim J. Interviewing one's peers: methodological issues in a study of health professionals. *Scand J Prim Health Care* 2006;24(4):251-6.
24. Chew-Graham CA, May CR, Perry MS. Qualitative research and the problem of judgement: lessons from interviewing fellow professionals. *Fam Pract* 2002;19(3):285-9.
25. Gossen M. Dialogical analyses of focus groups: data and analytical approaches. In: Marková I, editor. *Dialogue in focus groups*. London: Equinox Publishing Ltd, 2007.
26. Goffman E. *The Presentation of Self in Everyday Life*. New York: Doubleday, 1959.
27. Mishler EG. *Discourse of medicine: Dialectics of medical interview*. Norwood, NJ: Ablex, 1984.
28. Wear D, Aultman JM, Varley JD, Zarconi J. Making fun of patients: medical students' perceptions and use of derogatory and cynical humor in clinical settings. *Acad Med* 2006;81(5):454-62.
29. Bennett N, Lockyer J, Mann K, Batty H, LaForet K, Rethans JJ, et al. Hidden curriculum in continuing medical education. *J Contin Educ Health Prof* 2004;24(3):145-52.
30. Weber M. *Wirtschaft und Gesellschaft*. Tübingen: J.B.C. Mohr, 1976.
31. Bourdieu P. *Meditasjoner (Méditations pascaliennes)*. Oslo: Pax forlag A/S, 1999.
32. Marková I. Themata in dialogue: taking social knowledge as shared. In: Marková I, editor. *Dialogue in focus groups*. London: Equinox Publications Ltd, 2007.
33. Vetlesen AJ. *Perception, empathy, and judgement: An Inquiry into the Preconditions of Moral Performance*. University park, PA: The Pennsylvania University Press, 1994.
34. Brondt A, Sokolowski I, Olesen F, Vedsted P. Continuing medical education and burnout among Danish GPs. *Br J Gen Pract* 2008;58(546):15-9.
35. Starfield B. Is patient-centered care the same as person-focused care? *Perm J* 2011;15(2):63-9.
36. Meador BT, Rogers C. Person-centered therapy. In: Corsini RJ, editor. *Current psychotherapies*, 2 ed. Itasca, Illinois: F.E. Peacock Publishers, 1979:131-84.
37. Frich JC, Høye S, Lindbaek M, Straand J. General practitioners and tutors' experiences with peer group academic detailing: a qualitative study. *BMC Fam Pract* 2010;11:12.
38. Straand J, Fetveit A, Rogstad S, Gjelstad S, Brekke M, Dalen I. A cluster-randomized educational intervention to reduce inappropriate prescription patterns for elderly patients in general practice--The Prescription Peer Academic Detailing (Rx-PAD) study [NCT00281450]. *BMC Health Serv Res* 2006;6:72.
39. Schön DA. *Educating the Reflective Practitioner. Toward a new design for teaching and learning in the professions*. San Francisco: Jossey-Bass, 1987.
1. Matalon A, Calo H, Yaphe J. The role of the staff meeting in resolving professional dilemmas in family medicine: concealing a diagnosis. *Eur J Gen Pract* 2004;10(1):35-6, 40.
2. Apker J, Eggly S. Communicating professional identity in medical socialization: considering the ideological discourse of morning report. *Qual Health Res* 2004;14(3):411-29.
3. Anspach RR. Notes on the sociology of medical discourse: the language of case presentation. *J Health Soc Behav* 1988;29(4):357-75.
4. Hill RF, Tyson EP, Riley HD, Jr. The culture of morning report: ethnography of a clinical teaching conference. *South Med J* 1997;90(6):594-600.
5. Gross CP, Donnelly GB, Reisman AB, Sepkowitz KA, Callahan MA. Resident expectations of morning report: a multi-institutional study. *Arch Intern Med* 1999;159(16):1910-4.
6. Greenhalgh T. *What Seems to be the Trouble? Stories in illness and healthcare*. Oxon: Radcliffe Publishing Ltd, 2006.
7. Charon R. *Narrative medicine: Honoring the Stories of Illness*. Oxford: Oxford University Press, 2006.
8. Marková I. Dialogism: interaction, social knowledge and dialogue. In: Marková I, editor. *Dialogue in focus groups*. London: Equinox Publishing Ltd, 2007.
9. Rommetveit R. *On message structure: A framework for the study of language and communication*. London and New York: Wiley, 1974.

- Formatted: Font: Calibri, 11 pt, Italic
- Formatted: Font: Calibri, 11 pt
- Formatted: Font: Calibri, 11 pt, Italic
- Formatted: Font: Calibri, 11 pt
- Formatted: Font: Calibri, 11 pt, Italic
- Formatted: Font: Calibri, 11 pt
- Formatted: Font: Calibri, 11 pt, Italic
- Formatted: Font: Calibri, 11 pt
- Formatted: Font: Calibri, 11 pt, Italic
- Formatted: Font: Calibri, 11 pt
- Formatted: Font: Calibri, 11 pt, Italic
- Formatted: Font: Calibri, 11 pt, Norwegian (Bokmål)
- Formatted: Font: Calibri, 11 pt, Norwegian (Bokmål)
- Formatted: Font: Calibri, 11 pt
- Formatted: Font: Calibri, 11 pt, Italic
- Formatted: Font: Calibri, 11 pt
- Formatted: Font: Calibri, 11 pt, Swedish (Sweden)
- Formatted: Font: Calibri, 11 pt, Italic, Swedish (Sweden)
- Formatted: Font: Calibri, 11 pt, Swedish (Sweden)
- Formatted: Font: Calibri, 11 pt, Italic, Swedish (Sweden)
- Formatted: Font: Calibri, 11 pt, Swedish (Sweden)
- Formatted: Font: Calibri, 11 pt, Norwegian (Nynorsk)
- Formatted: Font: Calibri, 11 pt
- Formatted: Font: Calibri, 11 pt, Italic
- Formatted: Font: Calibri, 11 pt
- Formatted: Font: Calibri, 11 pt, Italic
- Formatted: Font: Calibri, 11 pt
- Formatted: Font: Calibri, 11 pt, Italic
- Formatted: Font: Calibri, 11 pt
- Formatted: Font: Calibri, 11 pt, Italic
- Formatted: Font: Calibri, 11 pt
- Formatted: Font: Calibri, 11 pt, Italic
- Formatted: Font: Calibri, 11 pt
- Formatted: Font: Calibri, 11 pt, Italic
- Formatted: Font: Calibri, 11 pt
- Formatted: Font: Calibri, 11 pt, Italic
- Formatted: Font: Calibri, 11 pt
- Formatted: Indent: Left: 0", First line: 0"

10. Malhotra A, Gregory I, Darvill E, Goble E, Pryce-Roberts A, Lundberg K, et al. Mind the gap: Learners' perspectives on what they learn in communication compared to how they and others behave in the real world. *Patient Educ Couns* 2009;76(3):385-90.
11. Srinivasan M, Wilkes M, Stevenson F, Nguyen T, Slavin S. Comparing problem-based learning with case-based learning: effects of a major curricular shift at two institutions. *Acad Med* 2007;82(1):74-82.
12. Launer J. Moving on from Balint: embracing clinical supervision. *Br J Gen Pract* 2007;57(536):182-3.
13. Treweek S, Flottorp S, Frøtheim A, Havelrud K, Kristoffersen DT, Oxman A, et al. Hva gjør fastleger for å holde seg faglig oppdatert? [What do general practitioners do to keep themselves up to date?]. *Tidsskr Nor Lægeforen* 2005;125(3):304-6.
14. Rabinowitz S, Maoz B, Weingarten M, Kasan R. Listening to patients' stories. Storytelling approach in family medicine. *Can Fam Physician* 1994;40:2098-102.
15. Premi J, Shannon S, Hartwick K, Lamb S, Wakefield J, Williams J. Practice-based small-group CME. *Acad Med* 1994;69(10):800-2.
16. Armson H, Kinzie S, Hawes D, Roder S, Wakefield J, Elmslie T. Translating learning into practice: lessons from the practice-based small-group learning program. *Can Fam Physician* 2007;53(9):1477-85.
17. Pereles L, Lockyer J, Fidler H. Permanent small groups: group dynamics, learning, and change. *J Contin Educ Health Prof* 2002;22(4):205-13.
18. Peloso PM, Stakiw KJ. Small-group format for continuing medical education: a report from the field. *J Contin Educ Health Prof* 2000;20(1):27-32.
19. Eliasson G, Mattsson B. From teaching to learning. Experiences of small CME group work in general practice in Sweden. *Scand J Prim Health Care* 1999;17(4):196-200.
20. Abildsnes E, Walseth LT, Flottorp SA, Stensland PS. Lifestyle consultation in general practice—the doctor's toolbox: a qualitative focus group study. *Fam Pract* 2011;28(2):220-5.
21. Bradley CP. Turning anecdotes into data—the critical incident technique. *Fam Pract* 1992;9(1):98-103.
22. Miller WL, Crabtree BJ. Clinical research. A multimethod typology and qualitative roadmap. *Doing Qualitative Research*. 2 ed. Thousand Oaks, CA: Sage, 1999:20-24.
23. Malterud K. Shared understanding of the qualitative research process. Guidelines for the medical researcher. *Fam Pract* 1993;10(2):201-6.
24. Coar L, Sim J. Interviewing one's peers: methodological issues in a study of health professionals. *Scand J Prim Health Care* 2006;24(4):251-6.
25. Chew-Graham CA, May CR, Perry MS. Qualitative research and the problem of judgement: lessons from interviewing fellow professionals. *Fam Pract* 2002;19(3):285-9.
26. Gossen M. Dialogical analyses of focus groups: data and analytical approaches. In: Marková I, editor. *Dialogue in focus groups*. London: Equinox Publishing Ltd, 2007.
27. Goffman E. *The Presentation of Self in Everyday Life*. New York: Doubleday, 1959.
28. Mishler EG. *Discourse of medicine: Dialectics of medical interview*. Norwood, NJ: Ablex, 1984.
29. Wear D, Aultman JM, Varley JD, Zarconi J. Making fun of patients: medical students' perceptions and use of derogatory and cynical humor in clinical settings. *Acad Med* 2006;81(5):454-62.
30. Bennett N, Lockyer J, Mann K, Batty H, LaForet K, Rethans JJ, et al. Hidden curriculum in continuing medical education. *J Contin Educ Health Prof* 2004;24(3):145-52.
31. Weber M. *Wirtschaft und Gesellschaft*. Tübingen: J.B.C. Mohr, 1976.
32. Bourdieu P. *Meditasjoner (Méditations pascaliennes)*. Oslo: Pax forlag A/S, 1999.
33. Marková I. Themata in dialogue: taking social knowledge as shared. In: Marková I, editor. *Dialogue in focus groups*. London: Equinox Publications Ltd, 2007.
34. Vetlesen AJ. *Perception, empathy, and judgement: An Inquiry into the Preconditions of Moral Performance*. University park, PA: The Pennsylvania University Press, 1994.
35. Brondt A, Sokolowski I, Olesen F, Vedsted P. Continuing medical education and burnout among Danish GPs. *Br J Gen Pract* 2008;58(546):15-9.



1  
2  
3  
4  
5  
6  
7  
8  
9  
10  
11  
12  
13  
14  
15  
16  
17  
18  
19  
20  
21  
22  
23  
24  
25  
26  
27  
28  
29  
30  
31  
32  
33  
34  
35  
36  
37  
38  
39  
40  
41  
42  
43  
44  
45  
46  
47  
48  
49  
50  
51  
52  
53  
54  
55  
56  
57  
58  
59  
60

36. Starfield B. Is patient-centered care the same as person-focused care? *Perm J* 2011;15(2):63-9.
37. Meador BT, Rogers C. Person-centered therapy. In: Corsini RJ, editor. *Current psychotherapies*. 2 ed. Itasca, Illinois: F.E. Peacock Publishers, 1979:131-84.
38. Frich JC, Høye S, Lindbaek M, Straand J. General practitioners and tutors' experiences with peer group academic detailing: a qualitative study. *BMC Fam Pract* 2010;11:12.
39. Straand J, Fetveit A, Rognstad S, Gjelstad S, Brekke M, Dalen I. A cluster-randomized educational intervention to reduce inappropriate prescription patterns for elderly patients in general practice—The Prescription Peer Academic Detailing (Rx-PAD) study [NCT00281450]. *BMC Health Serv Res* 2006;6:72.
40. Schön DA. *Educating the Reflective Practitioner. Toward a new design for teaching and learning in the professions*. San Francisco: Jossey-Bass, 1987.

Formatted: Indent: Left: 0", Hanging: 0.5"
